# Supplementary material
Source: publisher figshare collection journal article supplement (https://acs.figshare.com/ndownloader/files/4131940)

## Supporting Information

# Fluorinated alcohols as promoters for the metal-free direct substitution reaction of allylic alcohols with nitrogen, silyl and carbon nucleophiles

Paz Trillo, Alejandro Baeza\* and Carmen Nájera\*

Departamento de Química Orgánica, Facultad de Ciencias, and Instituto de Síntesis Orgánica (ISO),

Universidad de Alicante, Apdo 99, 03080 Alicante, Spain

Fax: +34 96 5903549

alex.baeza@ua.es, cnajera@ua.es

## Table of Contents

|                                                              |    |
|--------------------------------------------------------------|----|
| General Remarks.....                                         | 2  |
| <sup>1</sup> H and <sup>13</sup> C NMR of new compounds..... | 3  |
| <sup>1</sup> H NMR of known compounds.....                   | 11 |
| GC-MS of compound 3do.....                                   | 41 |

**General Remarks**

All the solvents and reagents were purchased from commercial sources and used without further purification. Substrates which were not commercially available were synthesized according to known literature procedures. Commercially available HFIP and TFE were used. Melting points are uncorrected. For IR only the structurally most relevant peaks are listed. NMR spectra were performed on 300 or 400 MHz apparatus using  $\text{CDCl}_3$  as solvent and TMS as internal standard unless otherwise stated. Conversions and compound purities were determined by GC analyses. Low-resolution electron impact (EI) mass spectra were obtained at 70eV and only the structurally most relevant fragmentations are reported. Analytical TLC was performed on pre-coated commercially available silica gel plates and the spots visualized with UV light at 254 nm. Flash chromatography employed prepackaged columns (12 mm  $\varnothing \times 7.5$  or 15 cm) using silica gel 60 (0.040-0.063 mm) and a chromatography pump. Enantiomeric excesses were determined by HPLC analyses with the corresponding chiral column, using mixtures of n-hexane/isopropyl alcohol as mobile phase.

**3am**  $^1\text{H}$  NMR

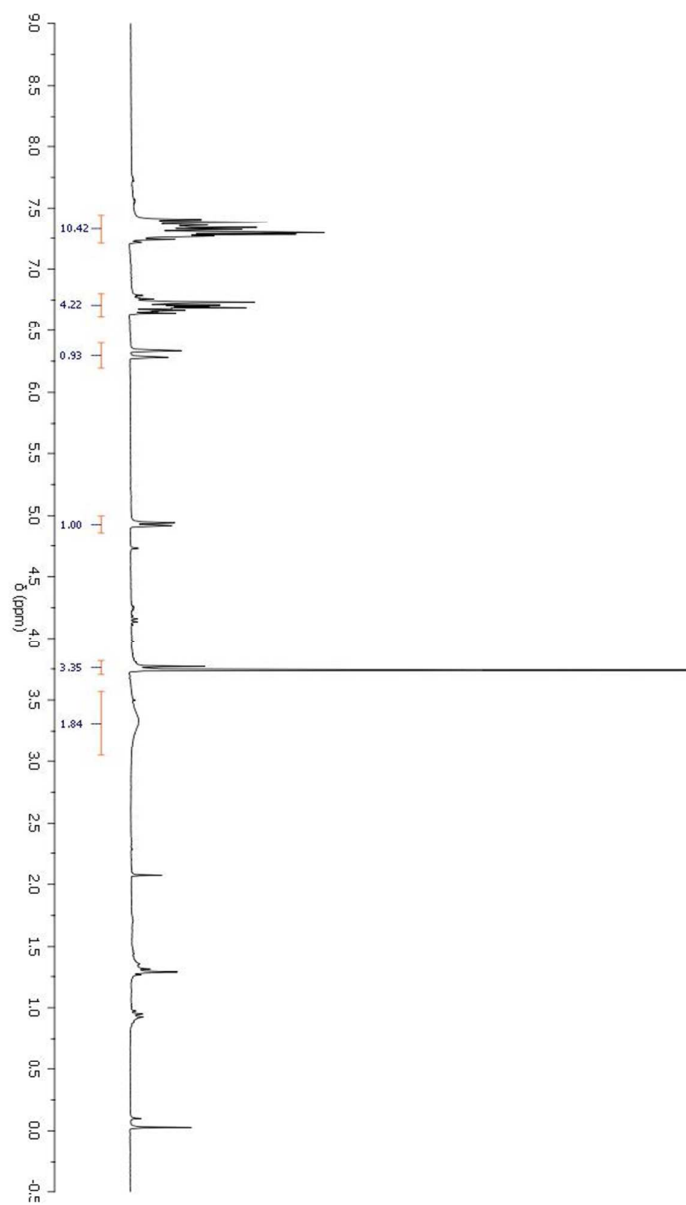

**3am**  $^{13}\text{C}$  NMR

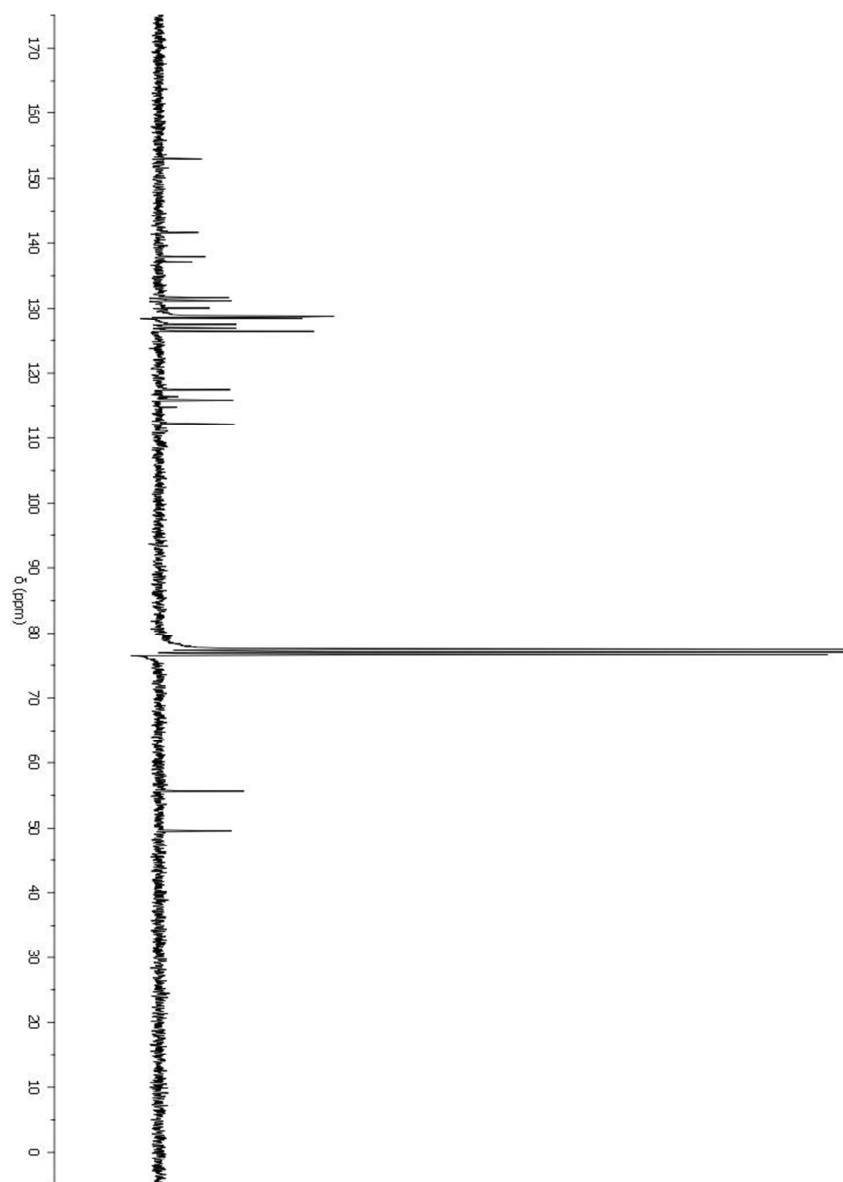

**3an**  $^1\text{H}$  NMR

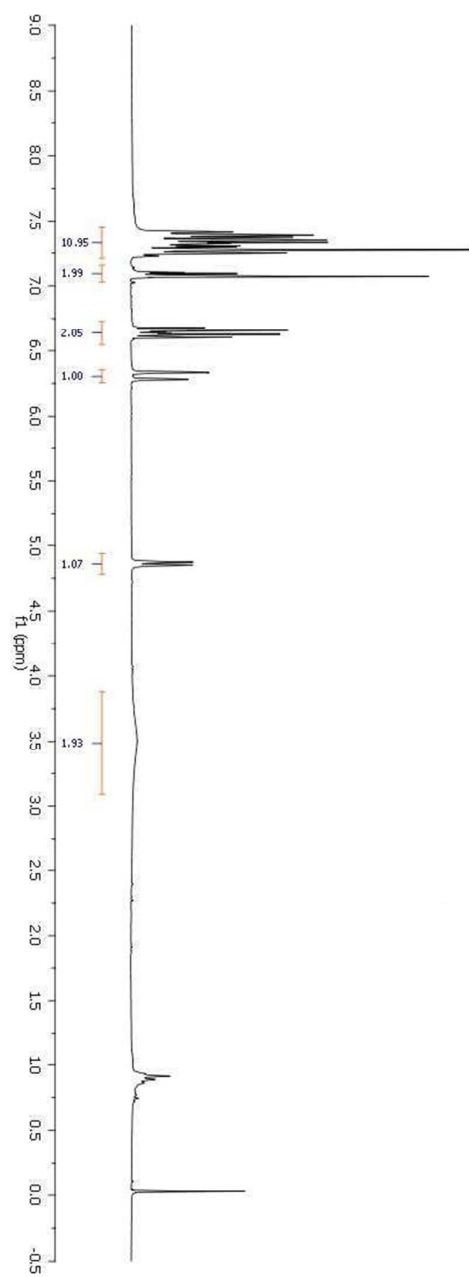

**3an**  $^{13}\text{C}$  NMR

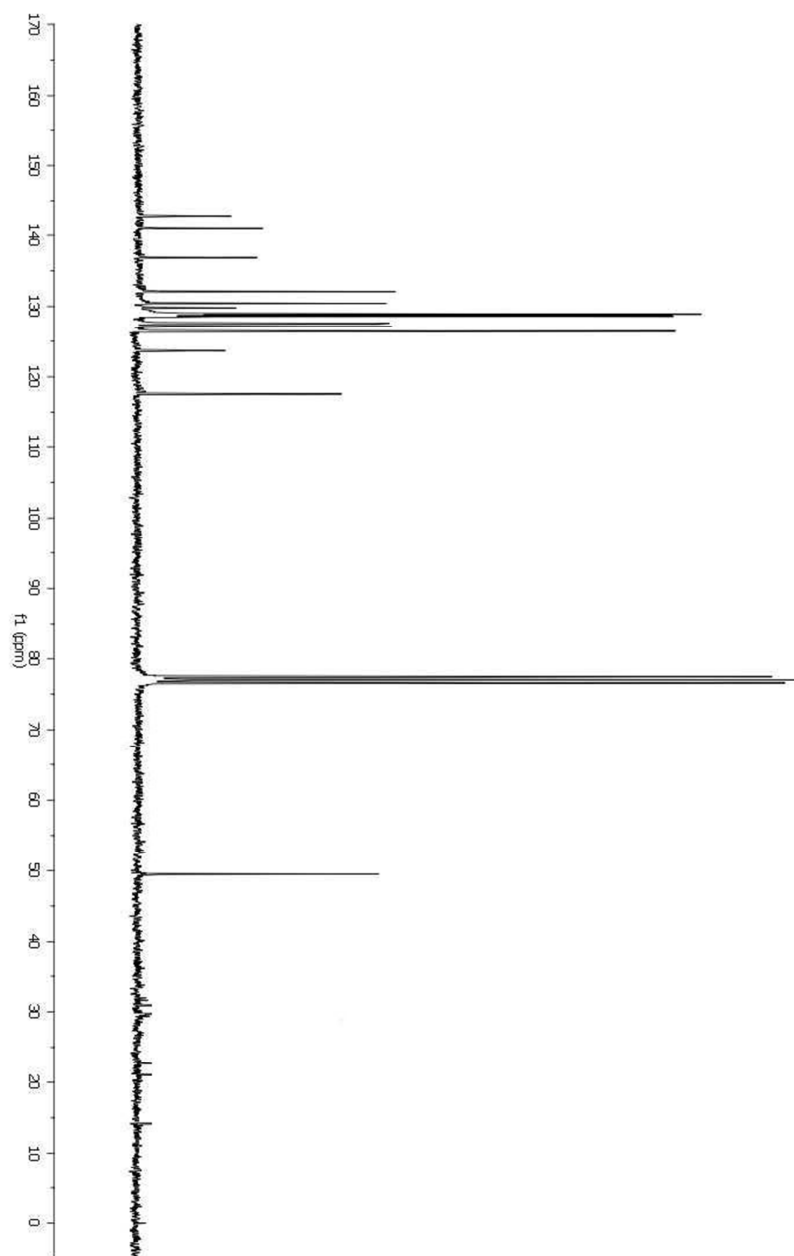

3as'  $^1\text{H}$  NMR

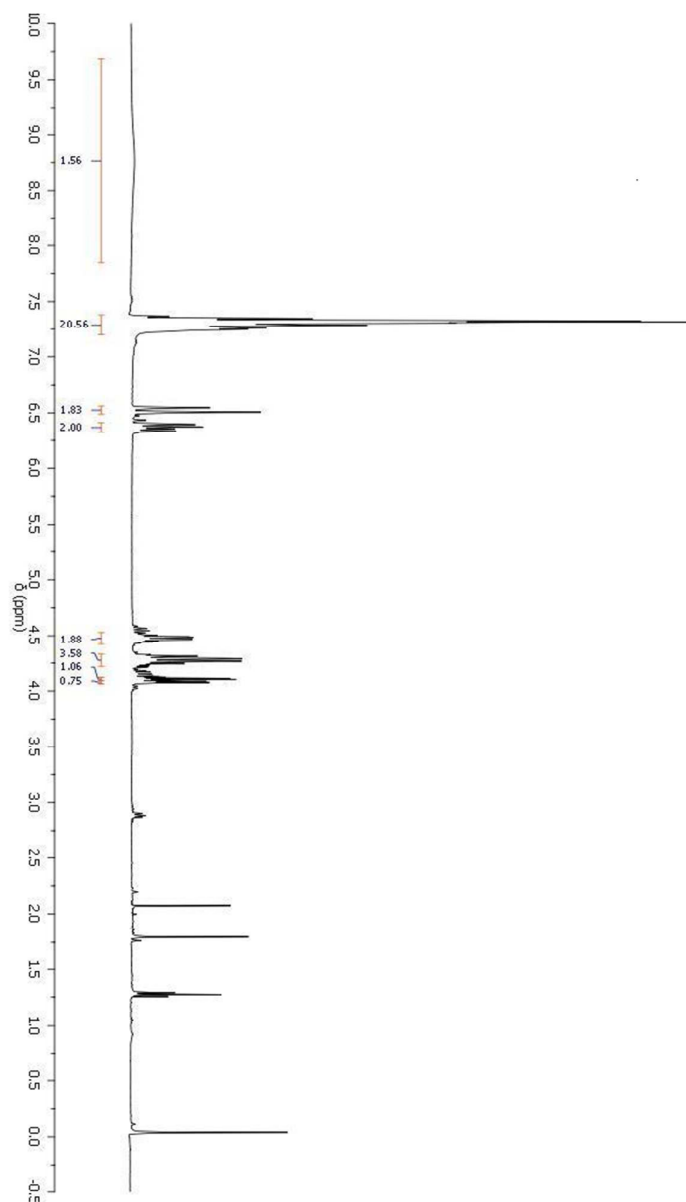

**3as'**  $^{13}\text{C}$  NMR

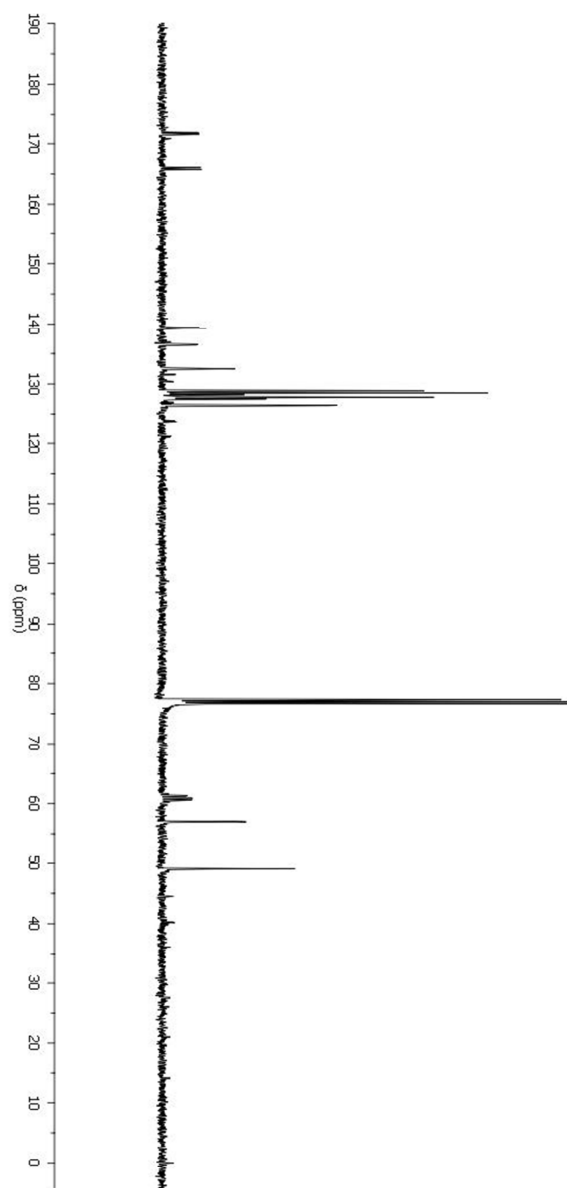



**3ga**  $^1\text{H}$  NMR

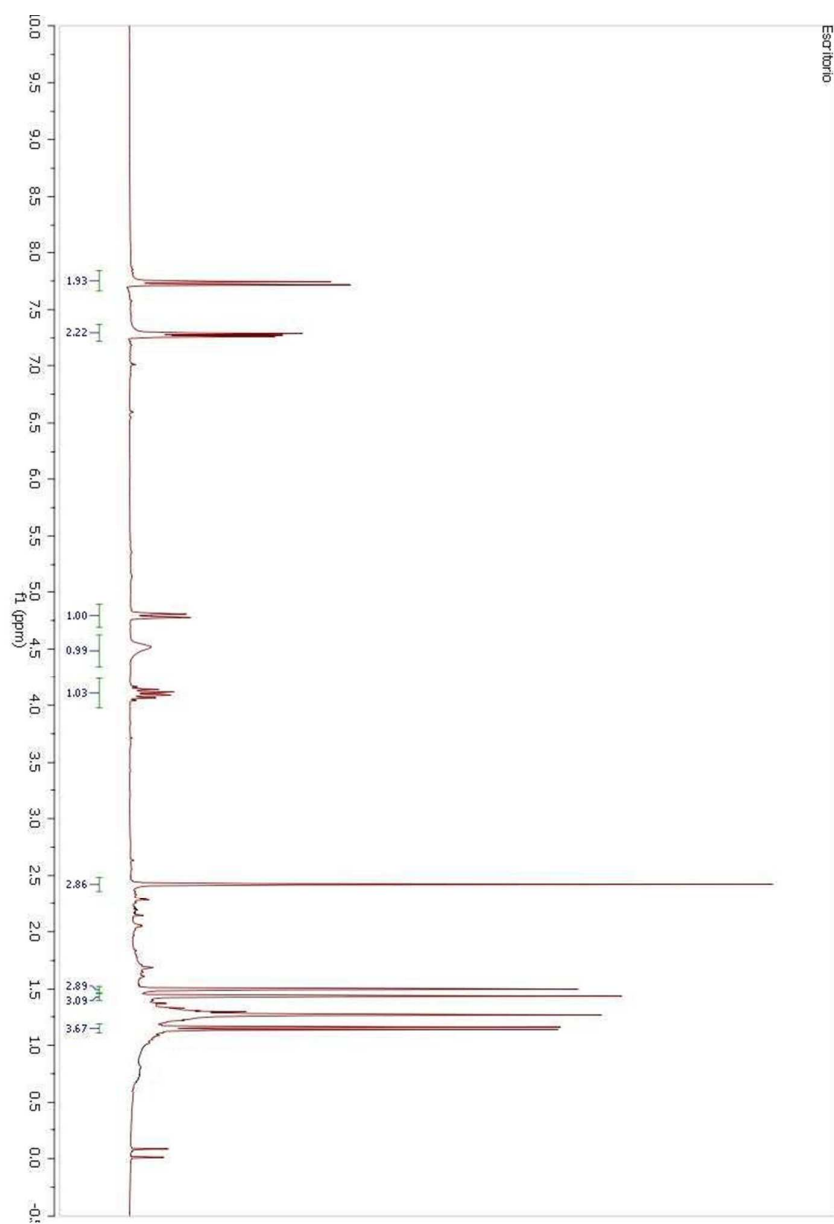

**3ga**  $^{13}\text{C}$  NMR

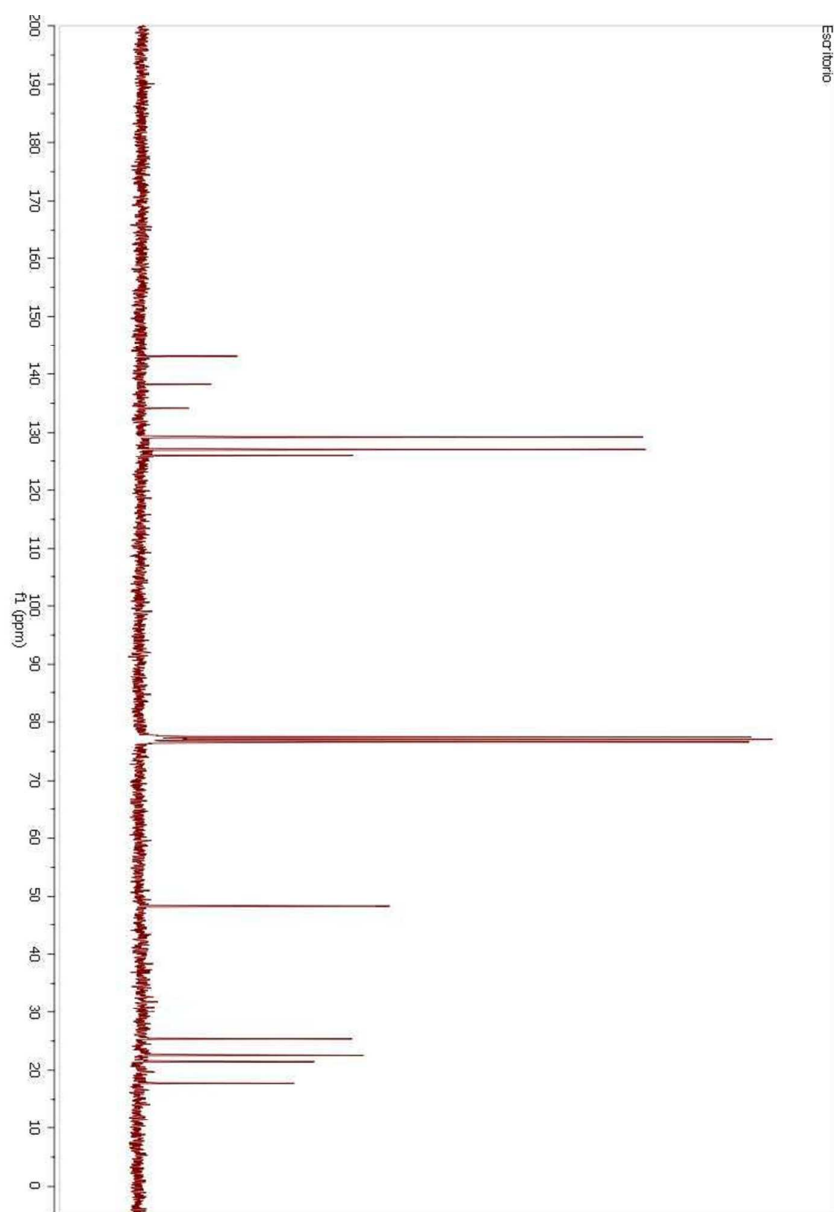

**3aa**  $^1\text{H}$  NMR

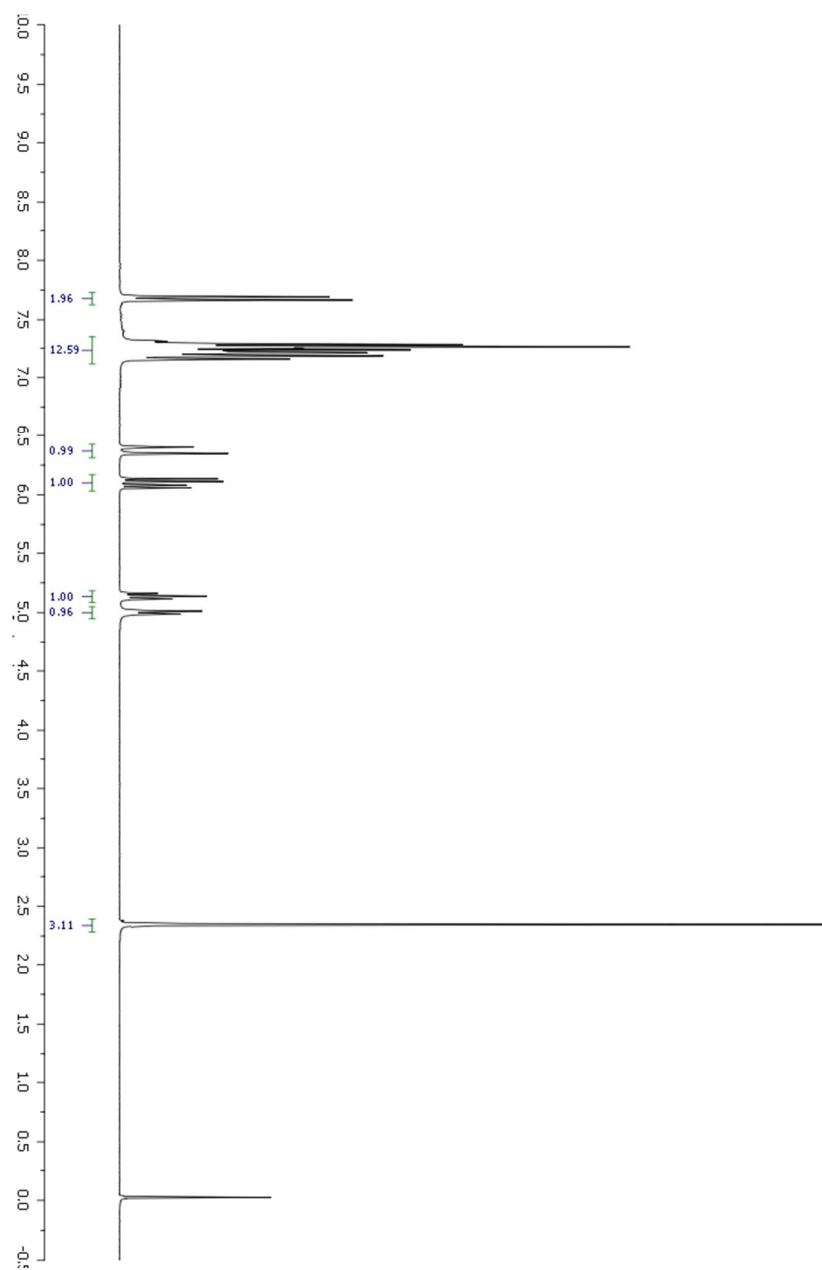

**3ab**  $^1\text{H}$  NMR

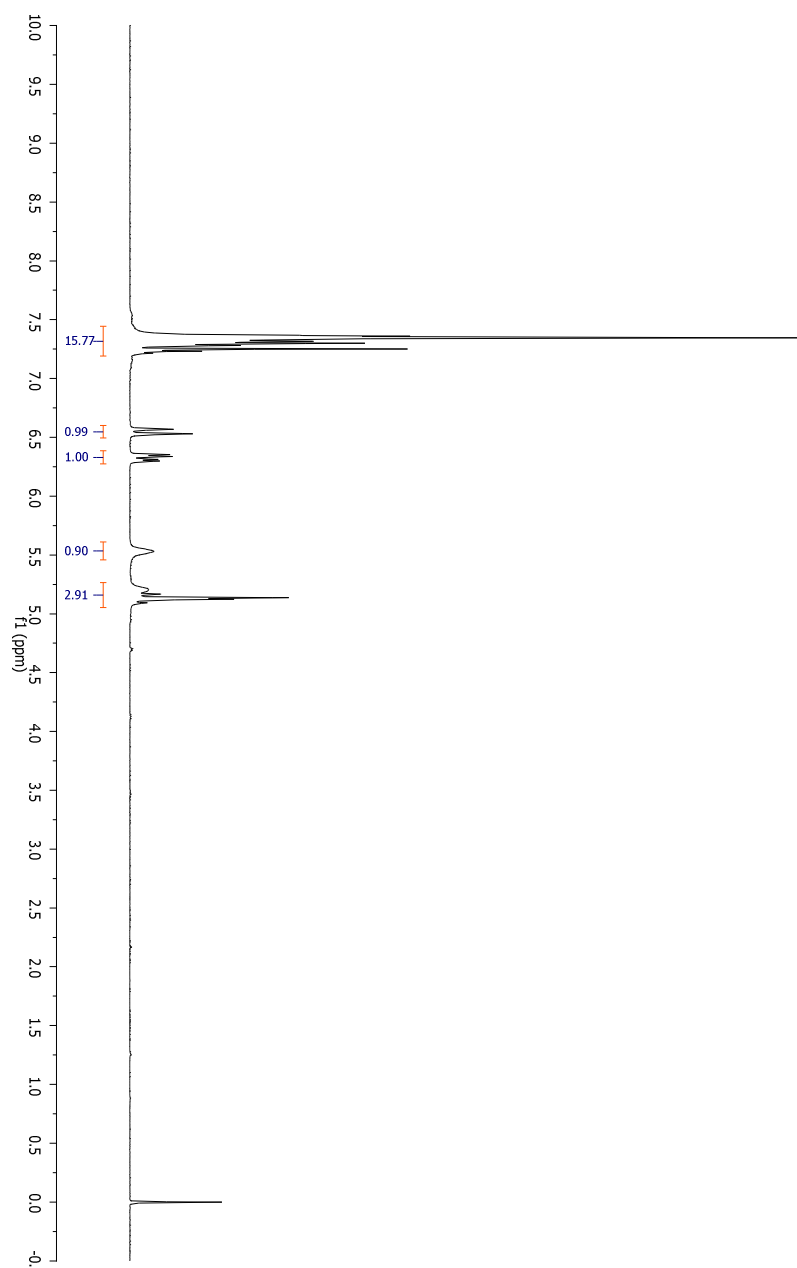

**3ac**  $^1\text{H}$  NMR

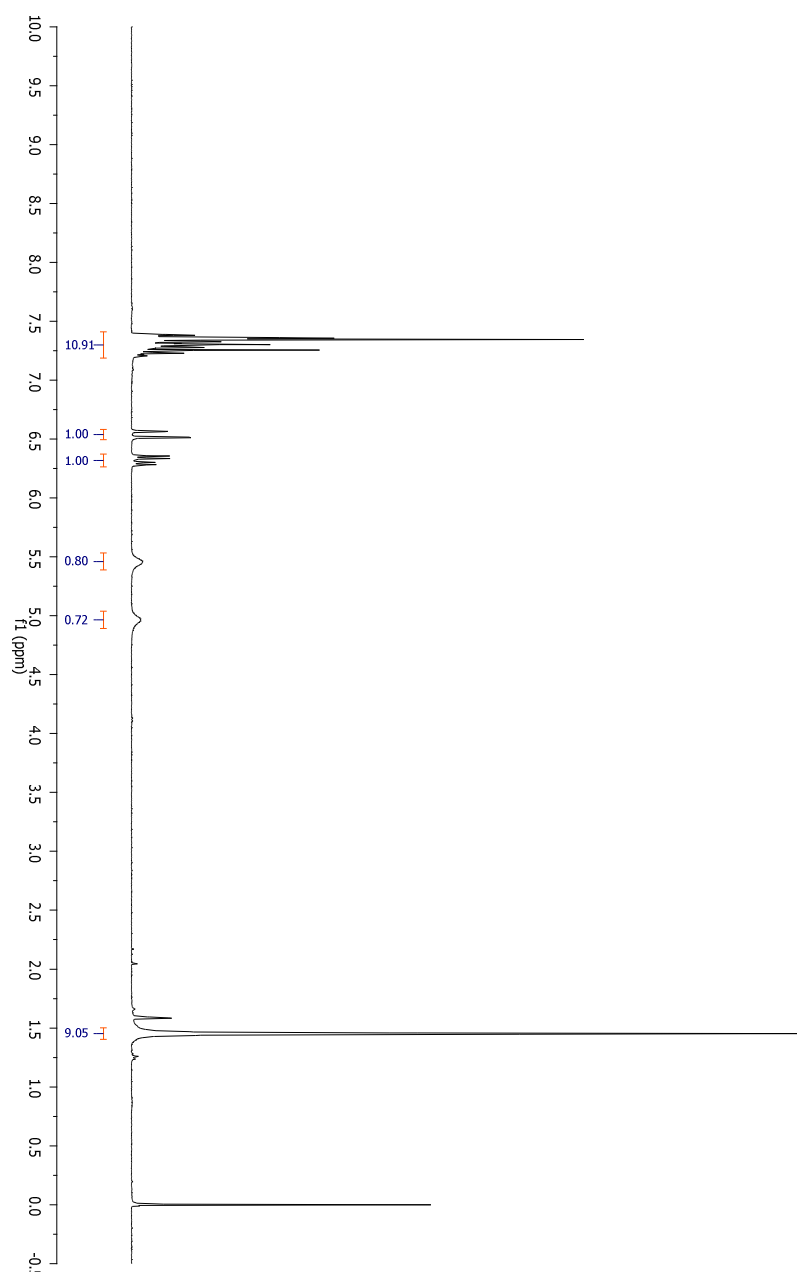

**3ad**  $^1\text{H}$  NMR

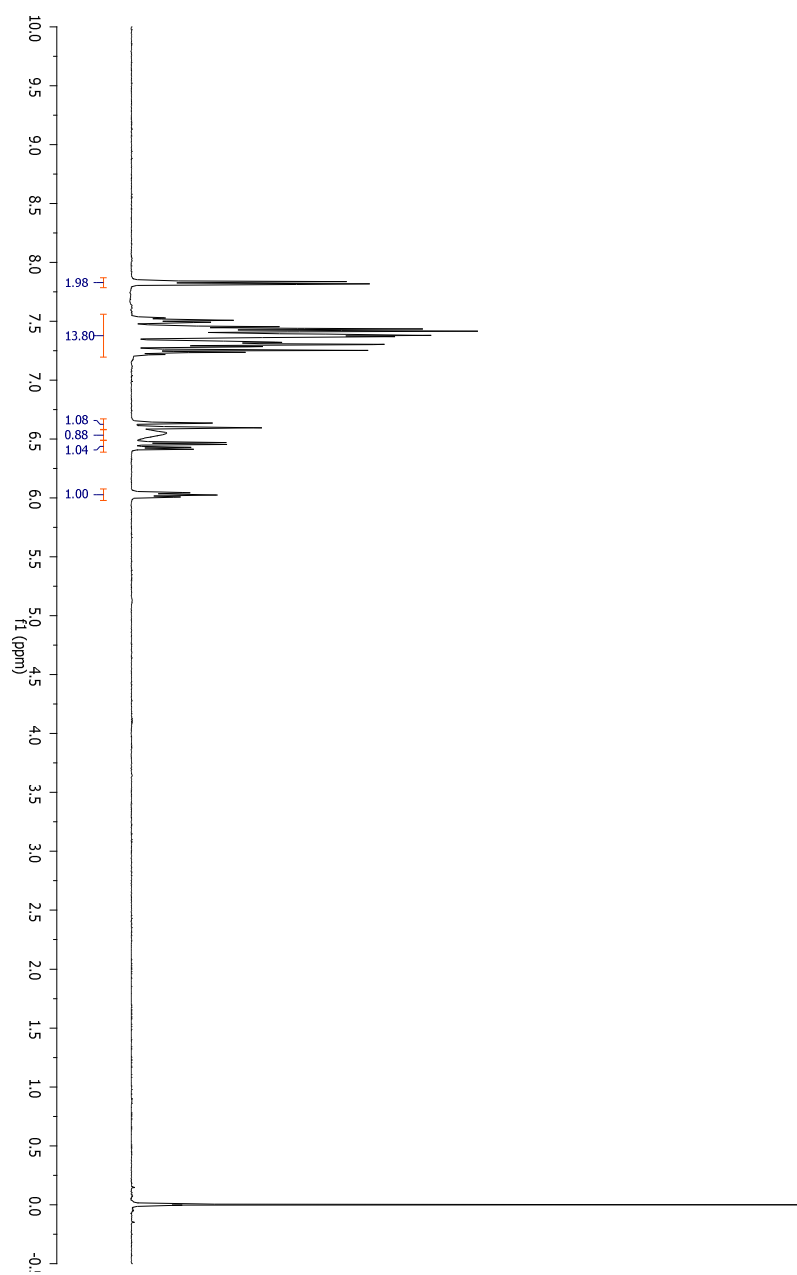

**3ae**  $^1\text{H}$  NMR

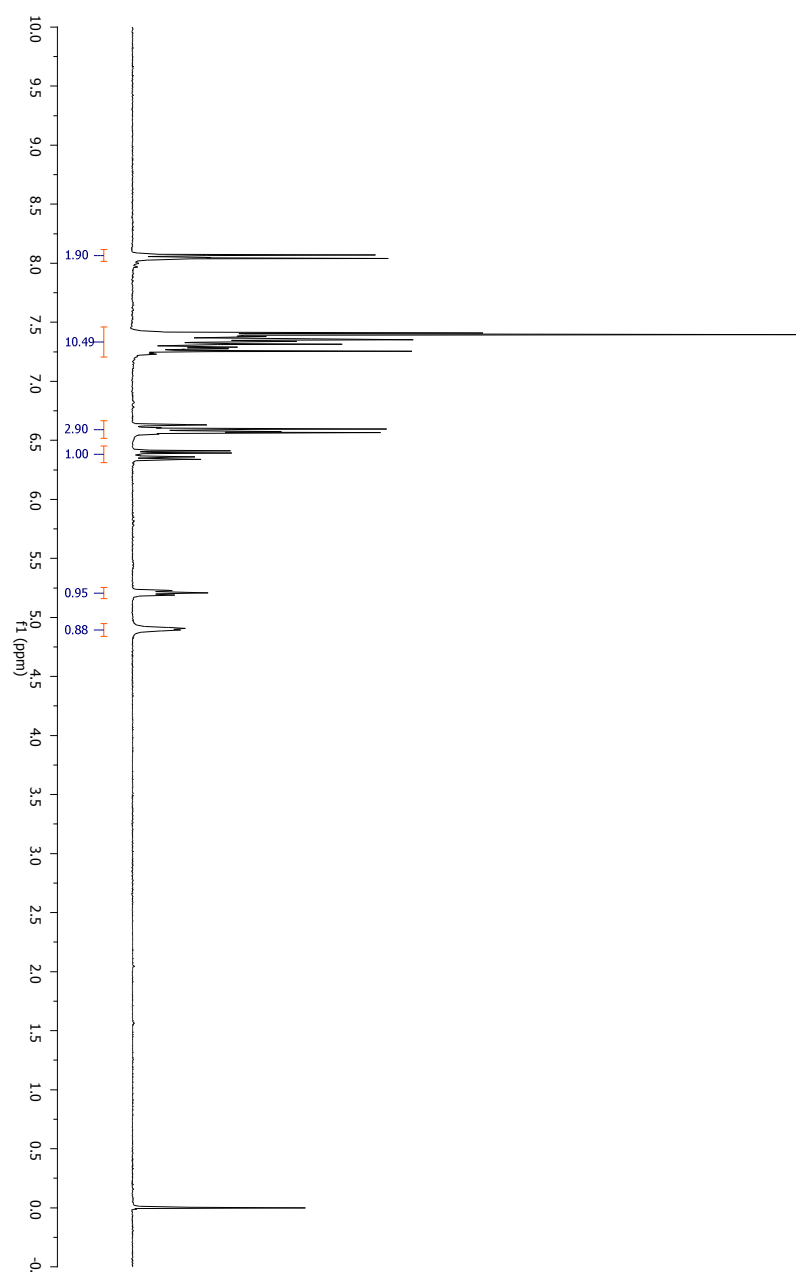

**3af**  $^1\text{H}$  NMR

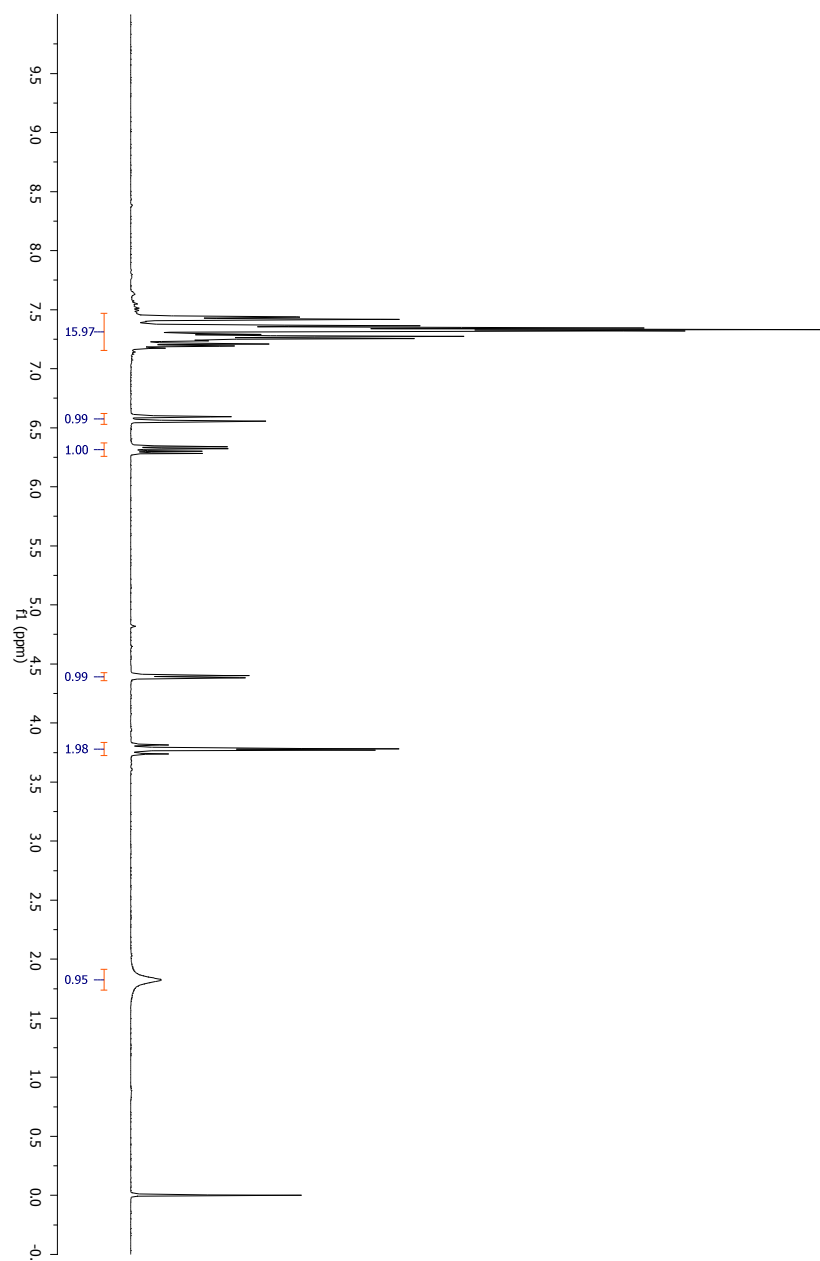



**3ag**  $^1\text{H}$  NMR

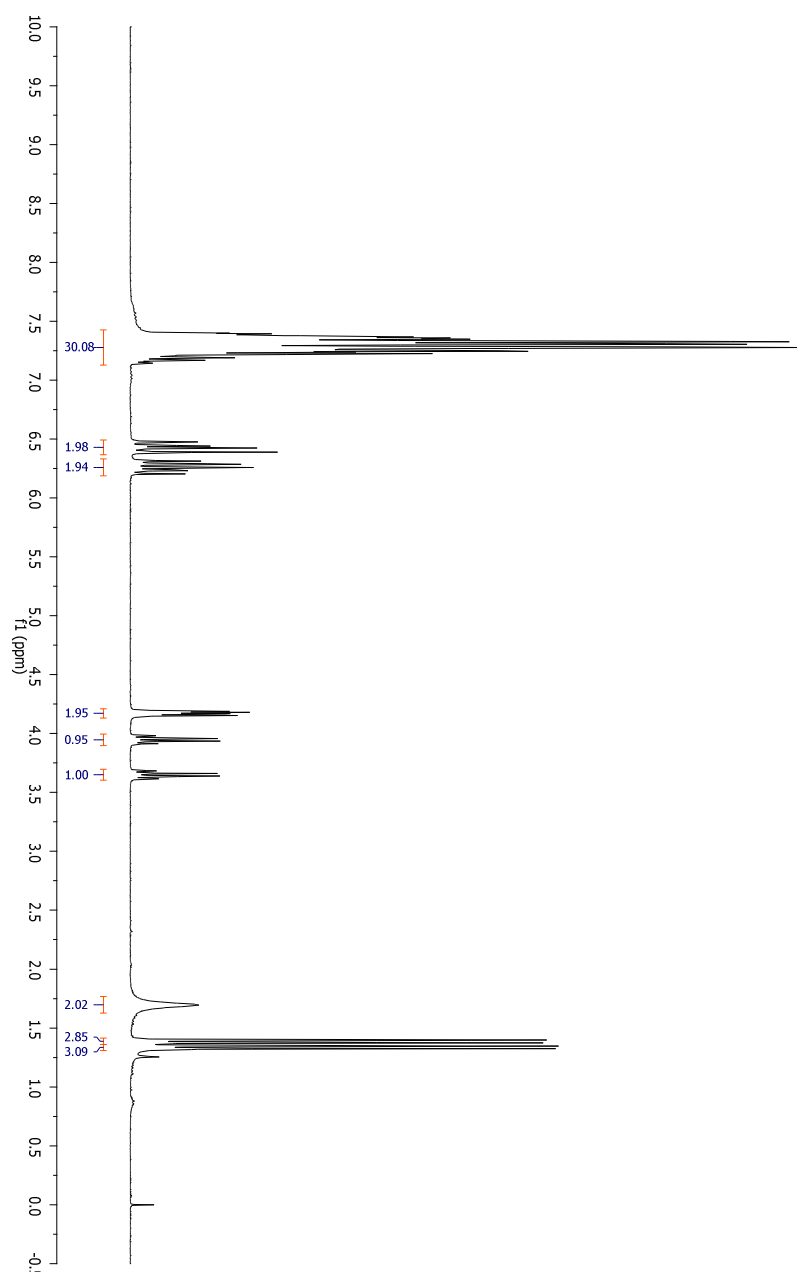

**3ah**  $^1\text{H}$  NMR

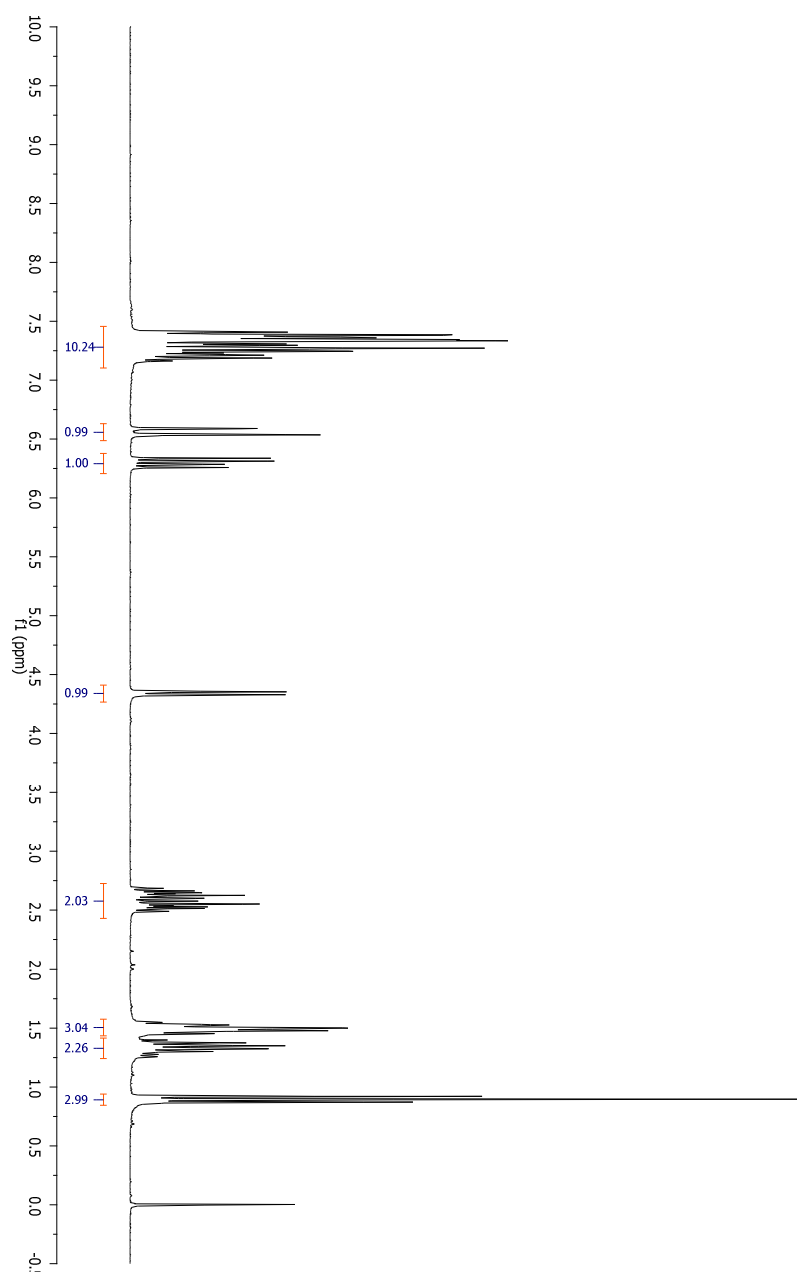

**3ai**  $^1\text{H}$  NMR

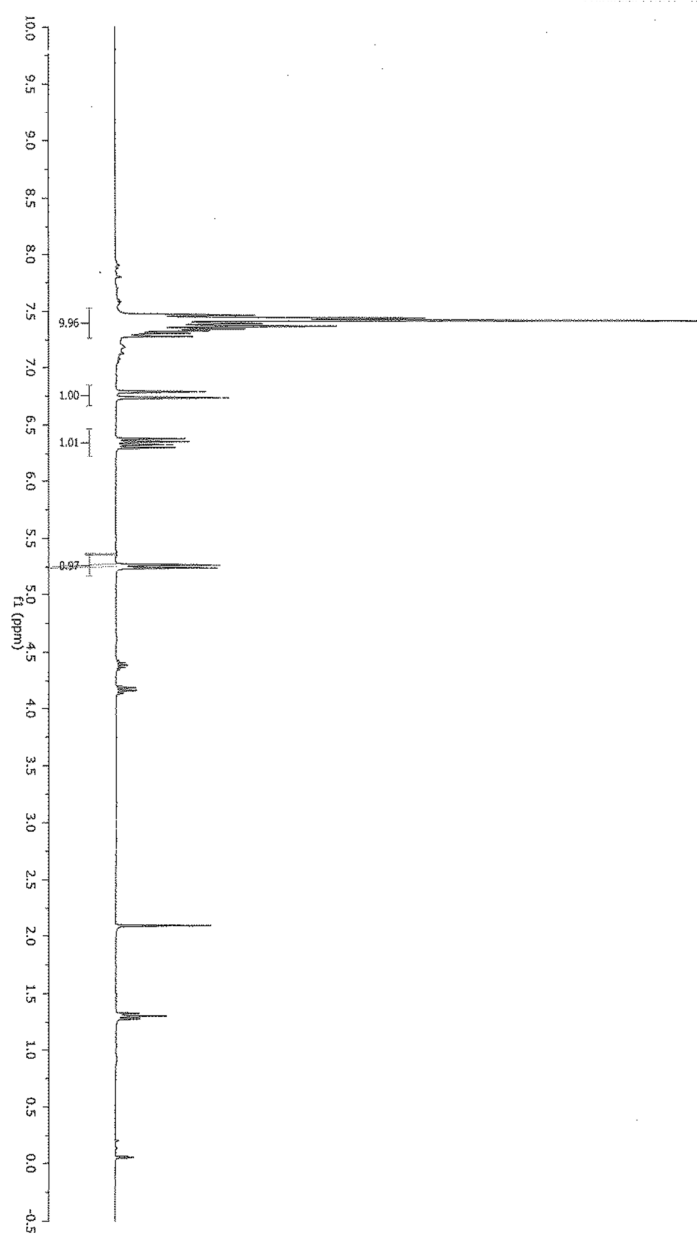

**3aj**  $^1\text{H}$  NMR

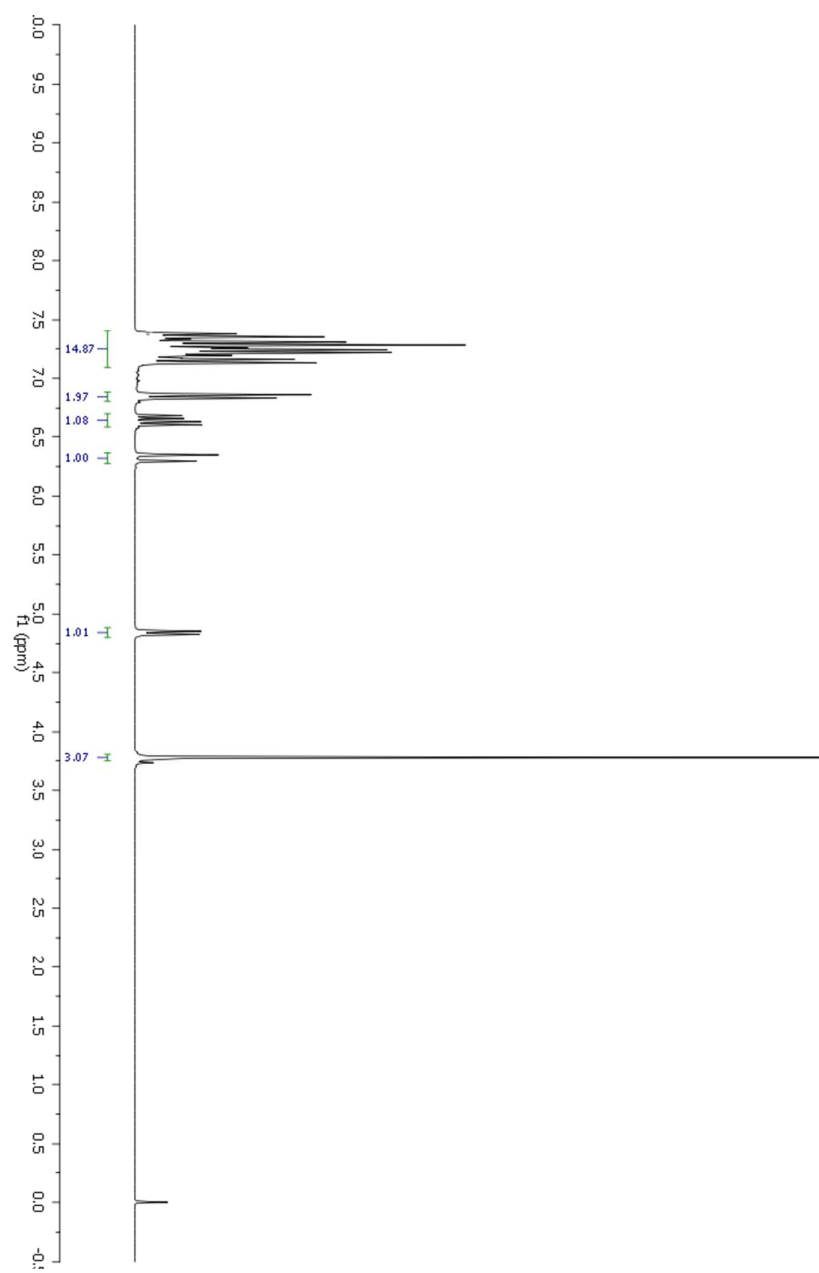

**3ak**  $^1\text{H}$  NMR

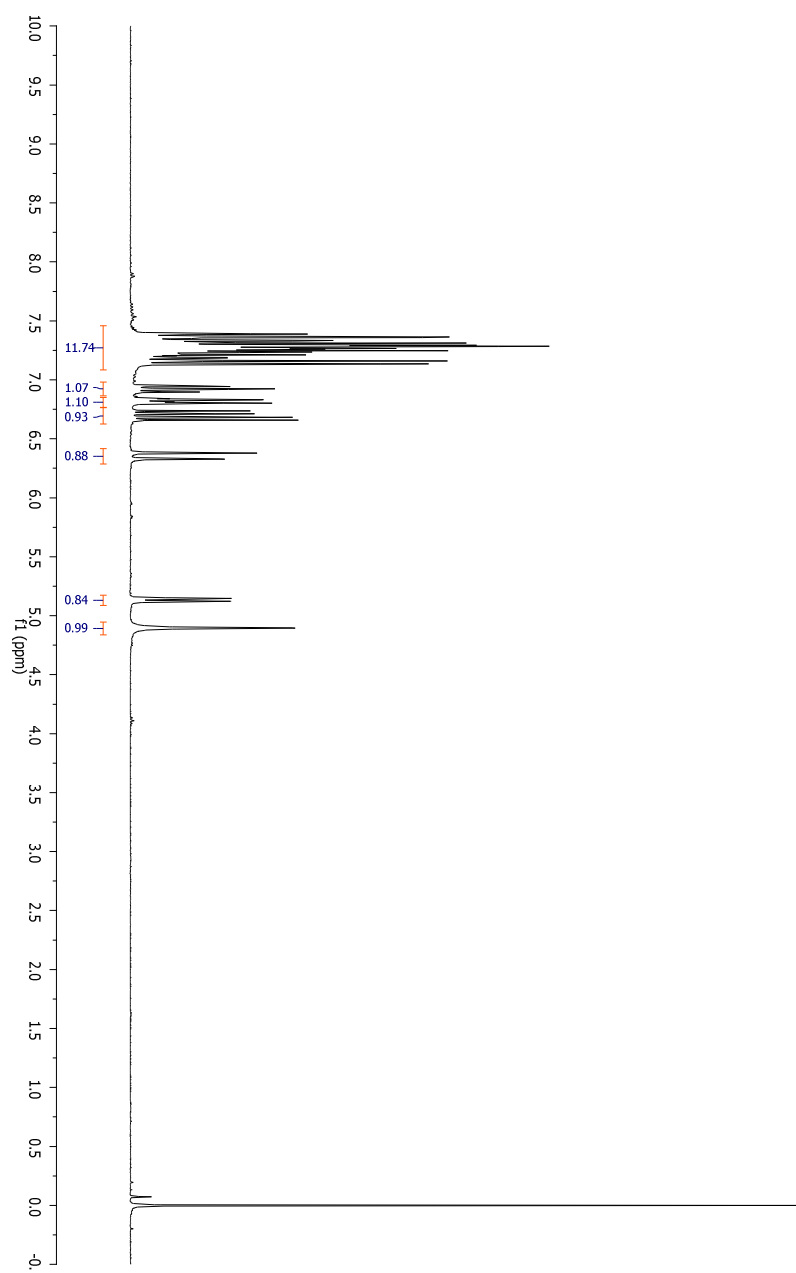

**3al**  $^1\text{H}$  NMR

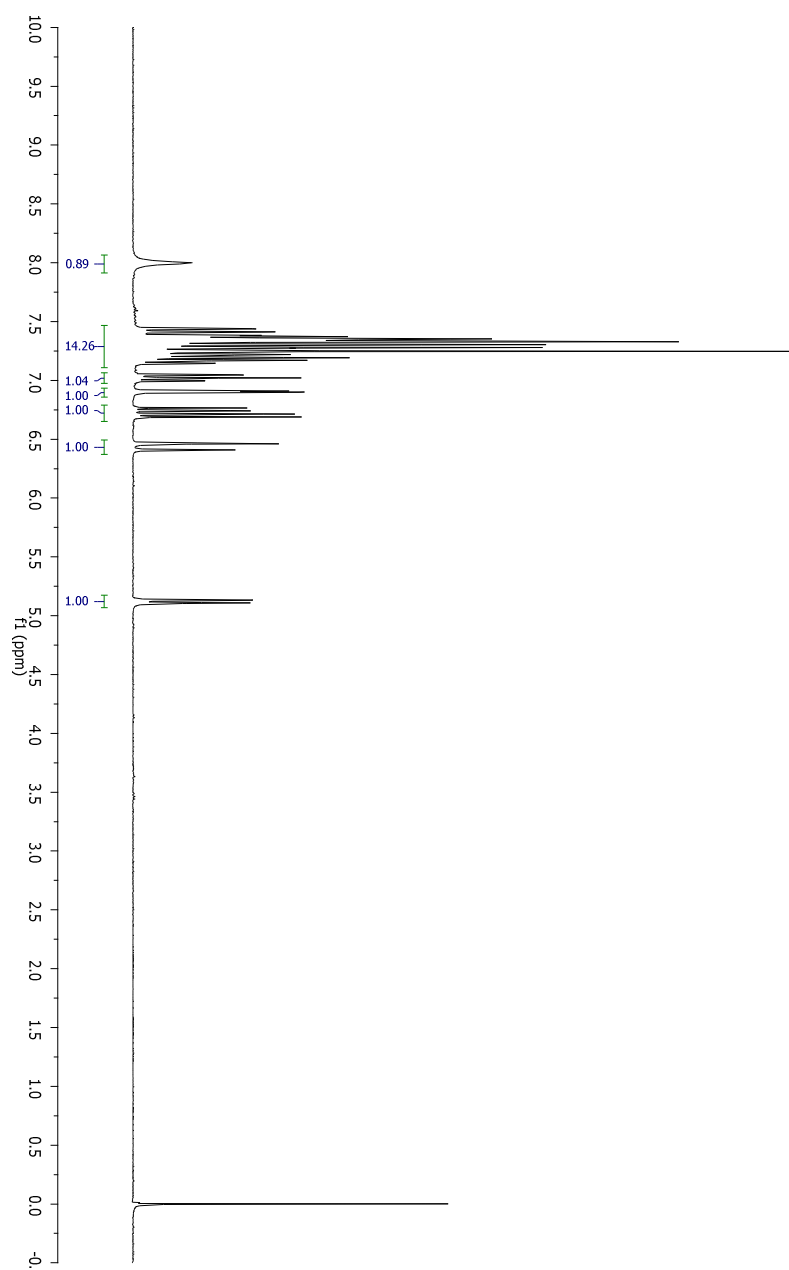

**3an'**  $^1\text{H}$  NMR

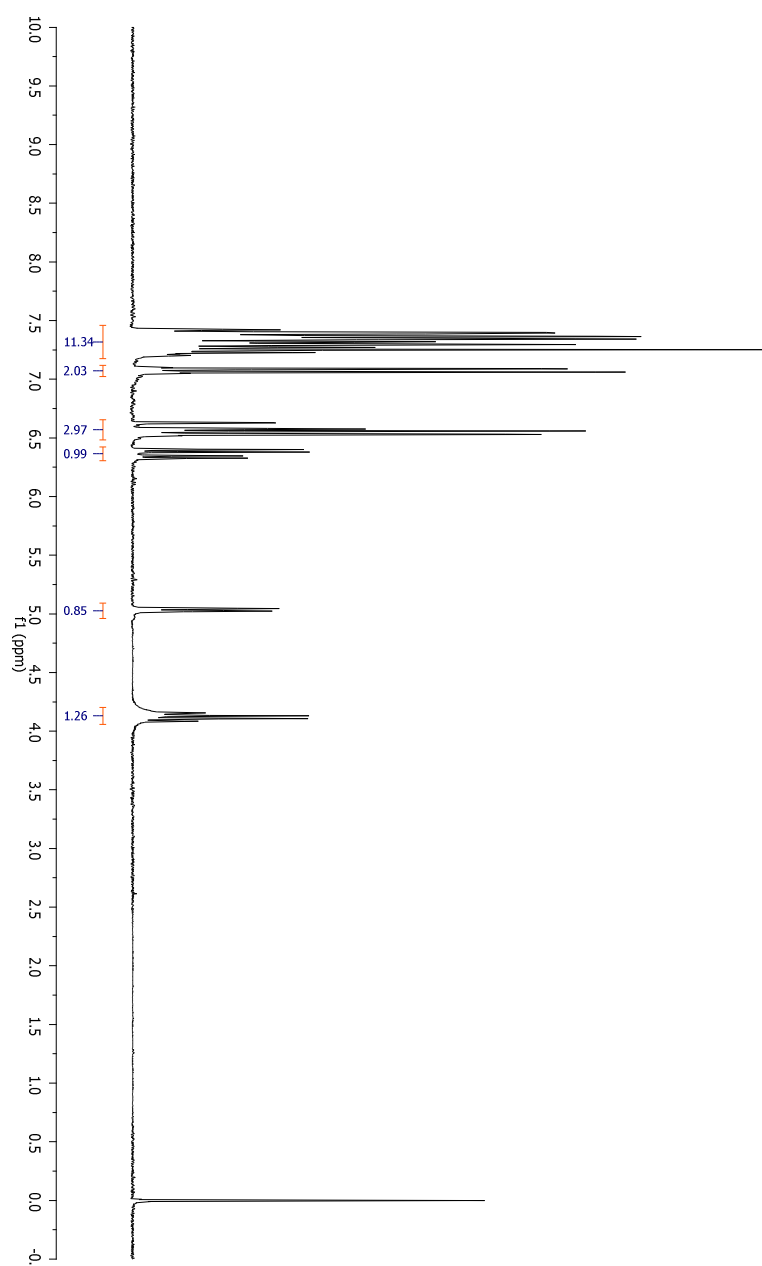

**3ao**  $^1\text{H}$  NMR

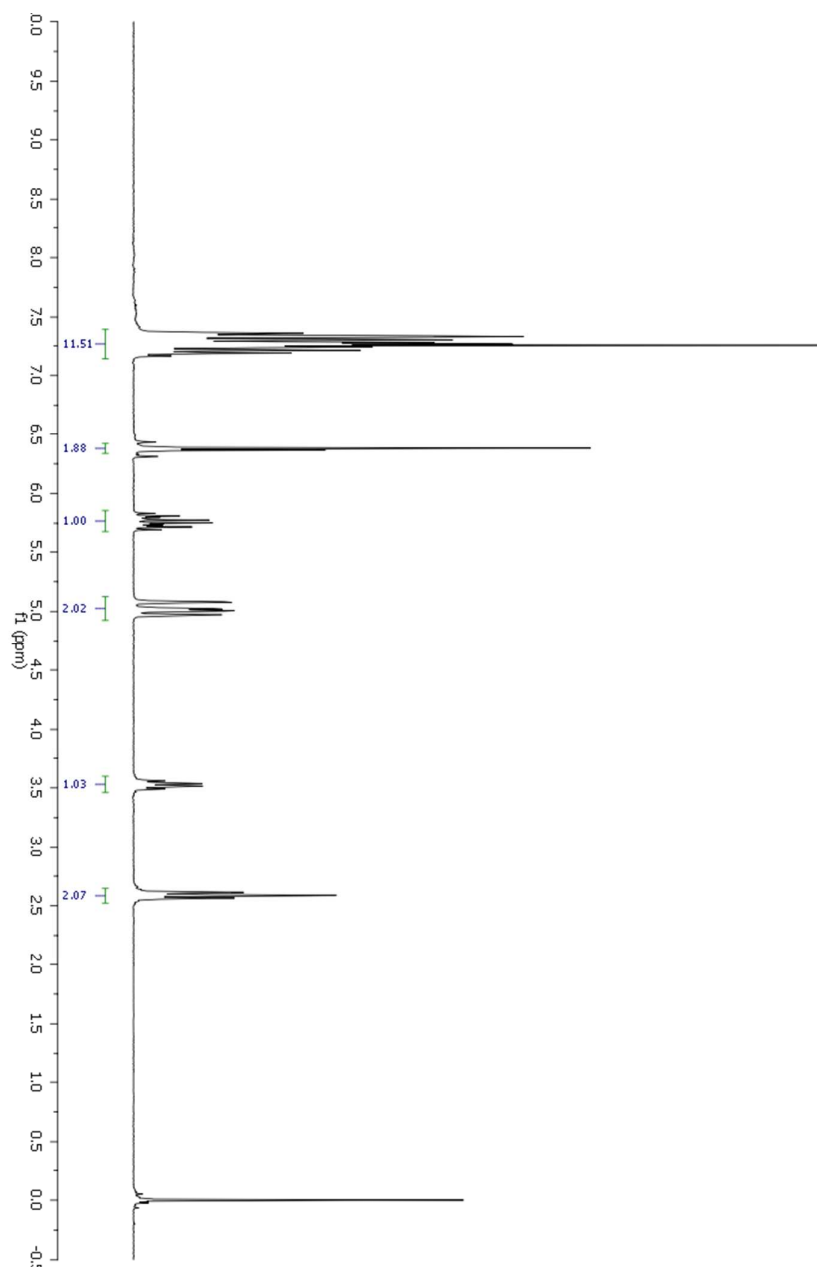



**3ap**  $^1\text{H}$  NMR

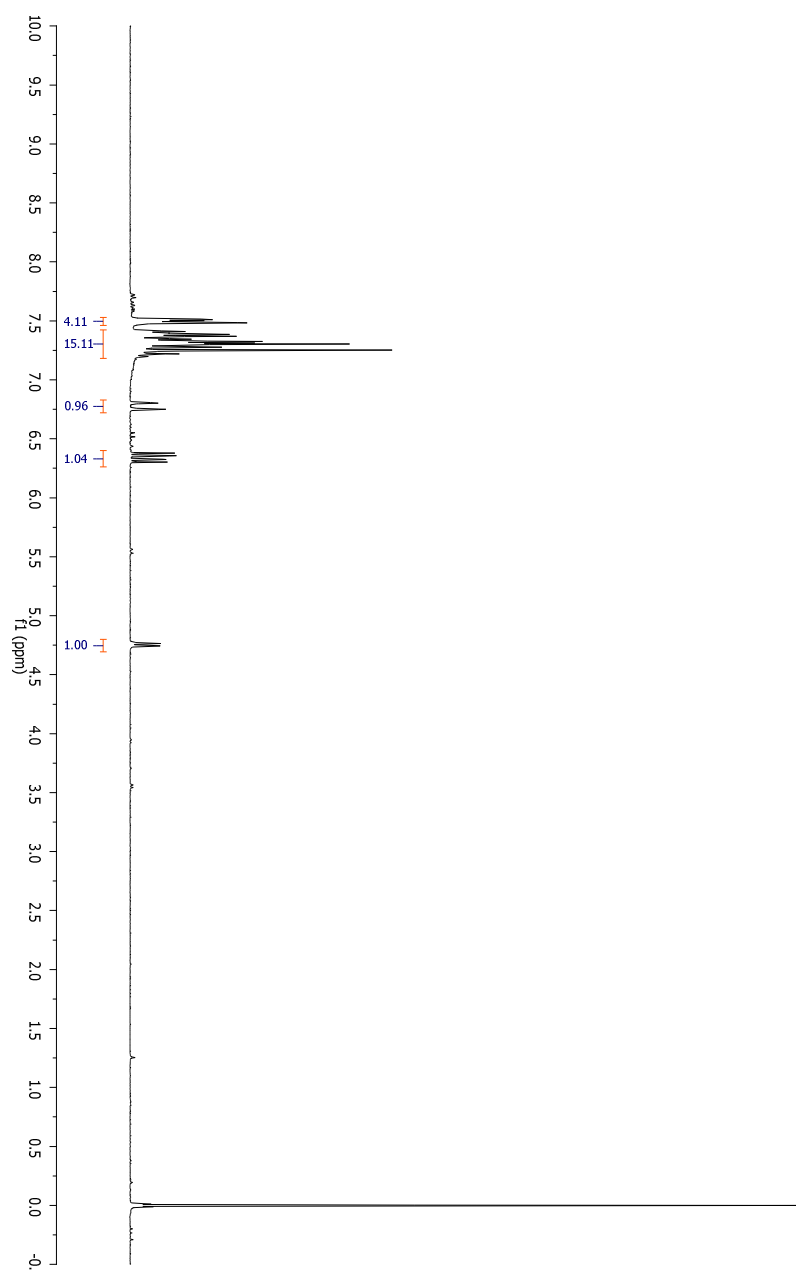

**3aq**  $^1\text{H}$  NMR

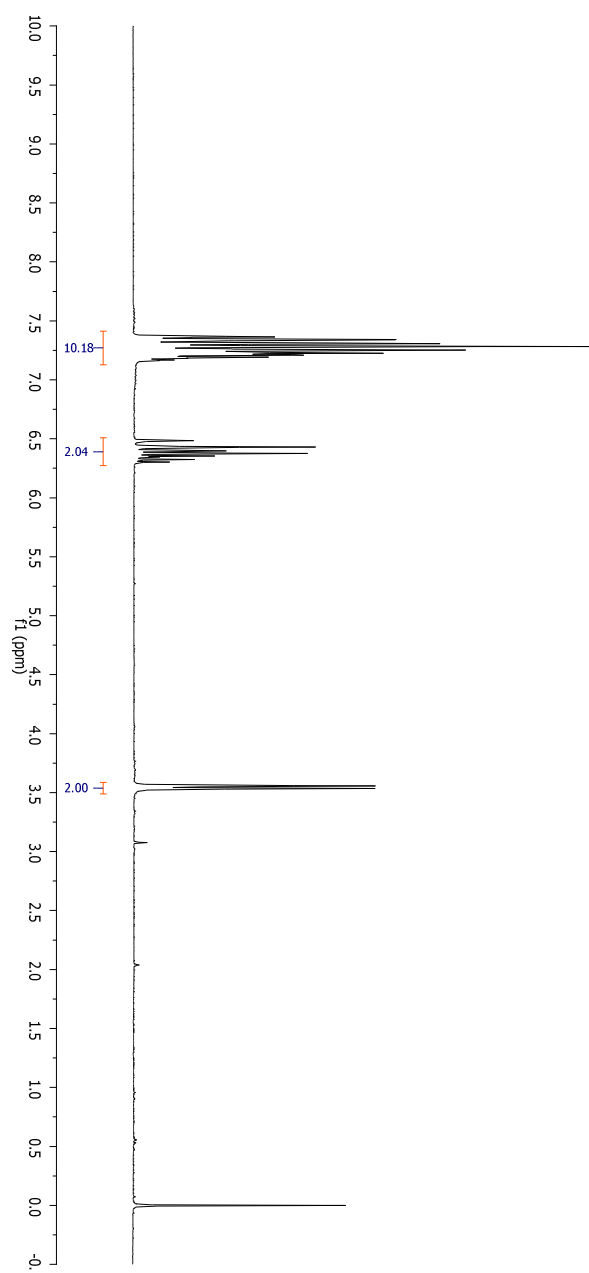

**3ar**  $^1\text{H}$  NMR

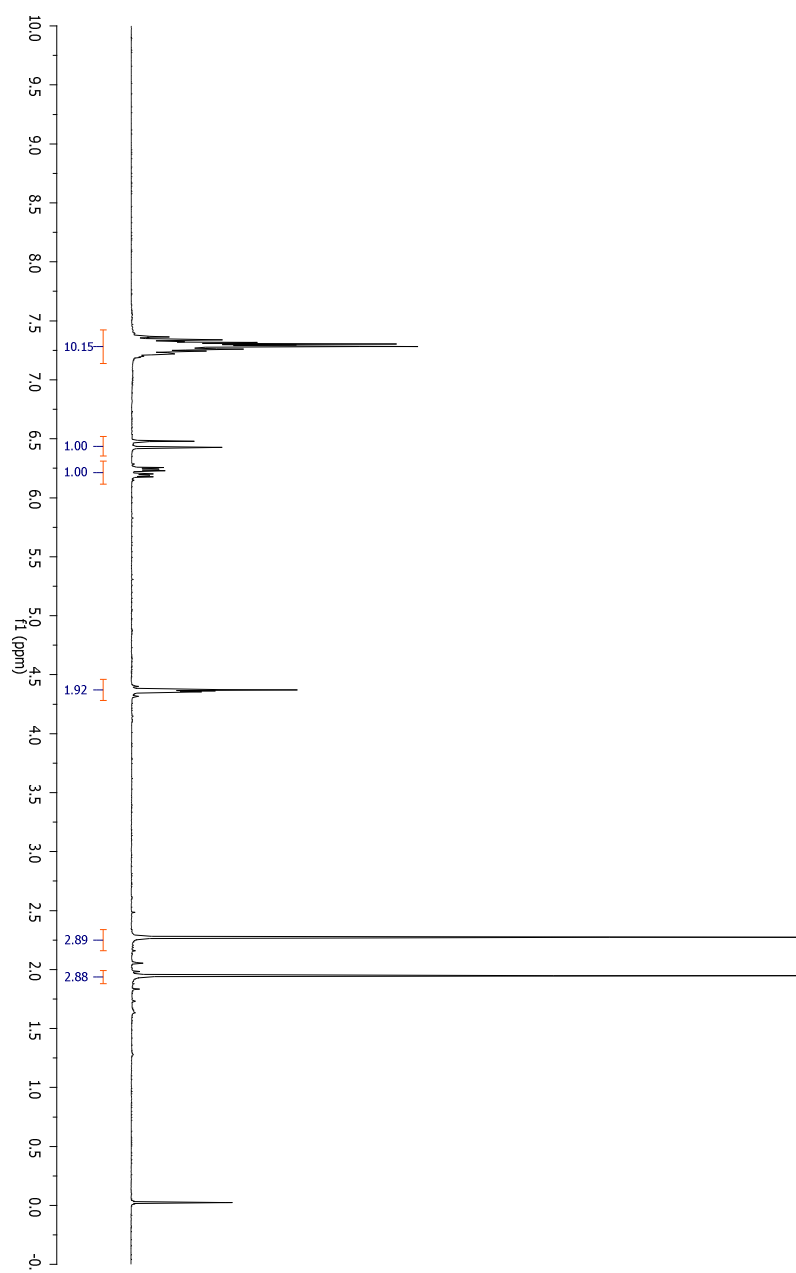

**3as**  $^1\text{H}$  NMR

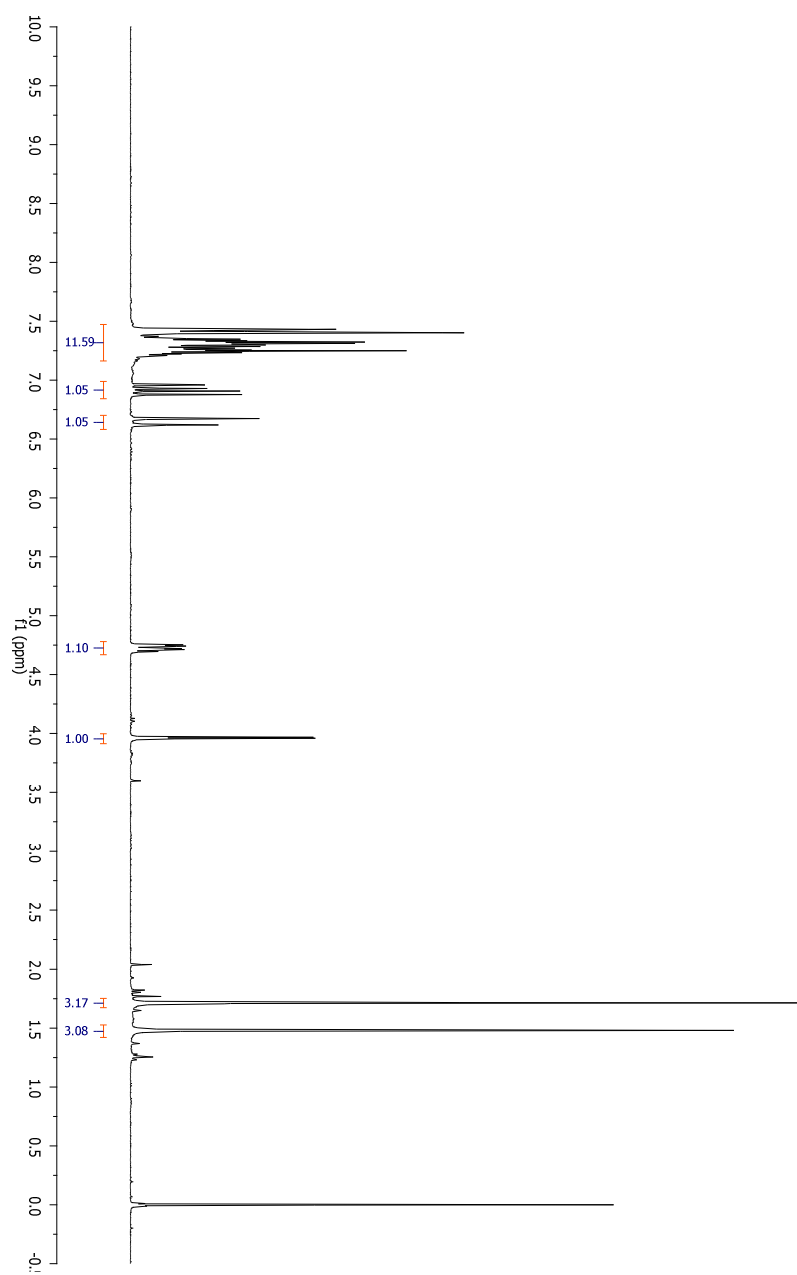

**3at**  $^1\text{H}$  NMR

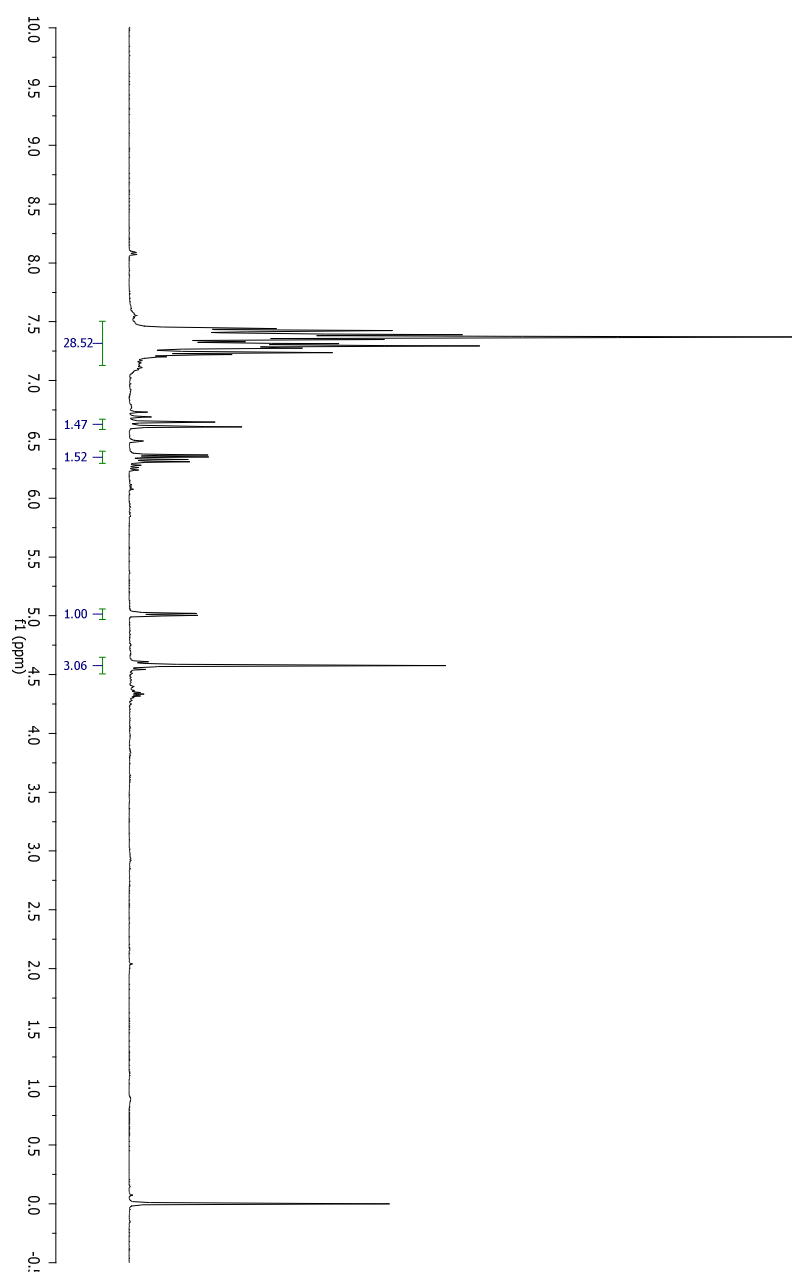

**3ba**  $^1\text{H}$  NMR

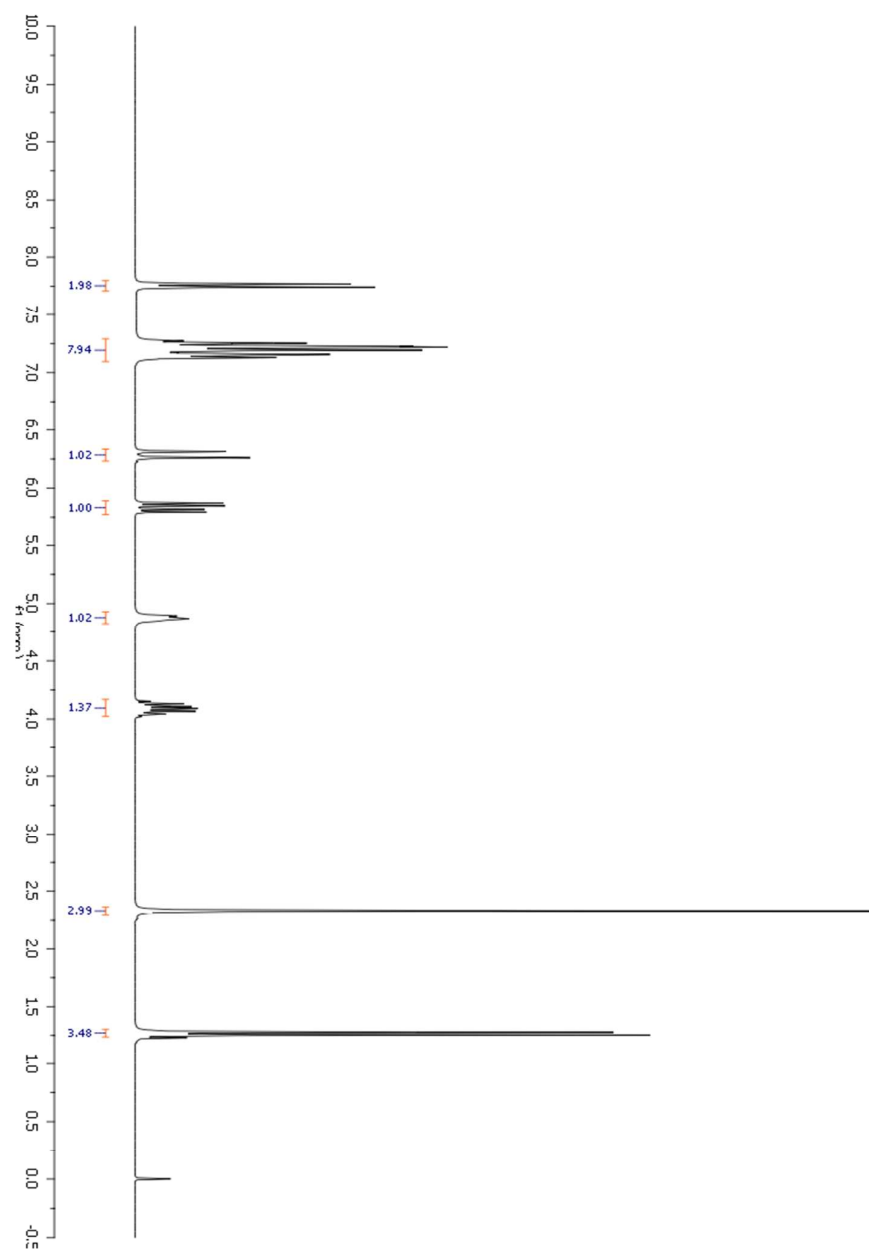

**3da**  $^1\text{H}$  NMR

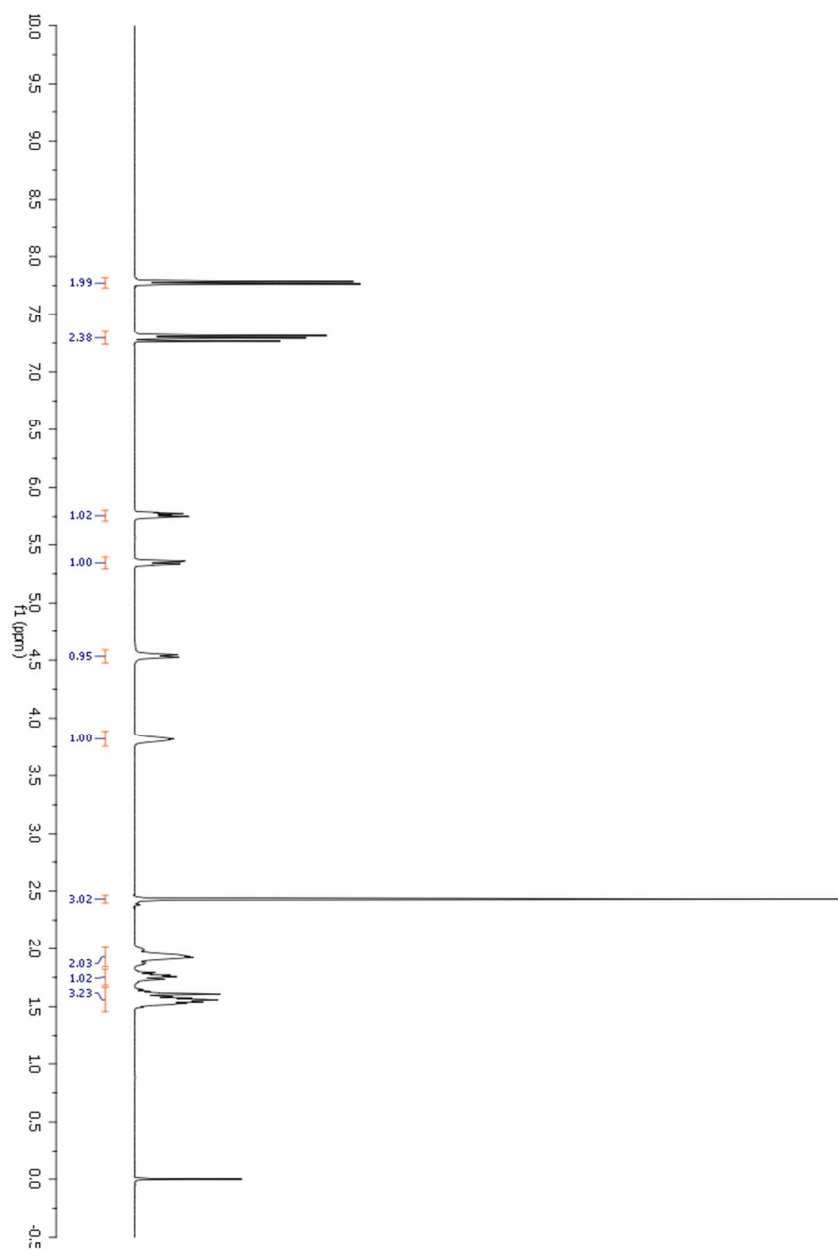

**3ea**  $^1\text{H}$  NMR

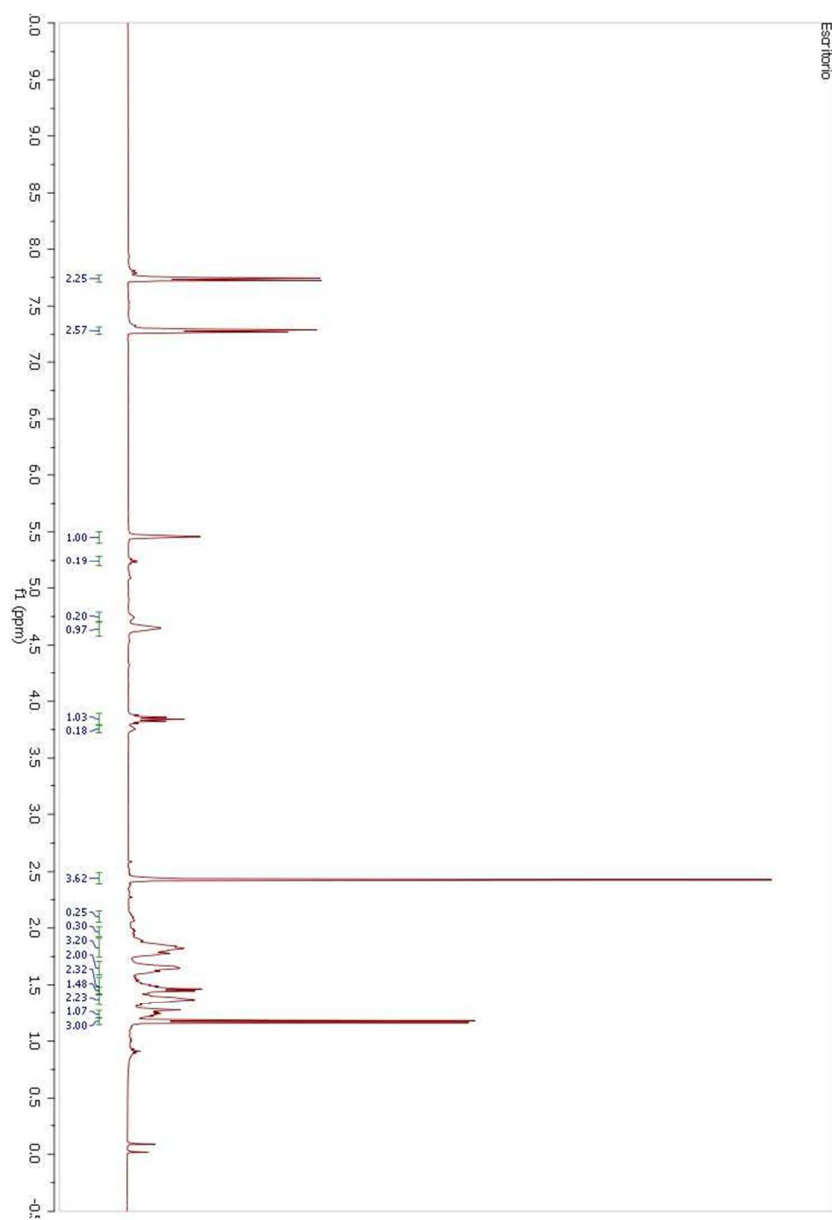



**3fa'**  $^1\text{H}$  NMR

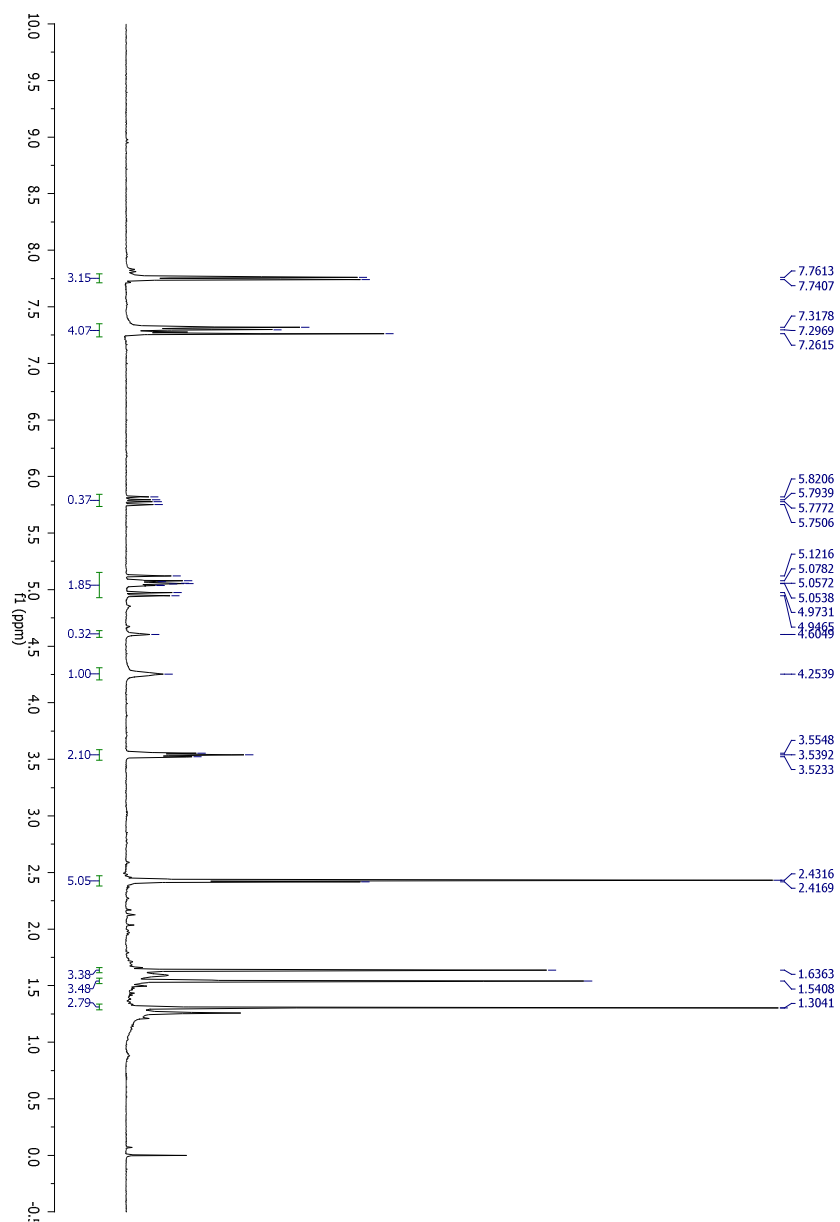

**3bj**  $^1\text{H}$  NMR

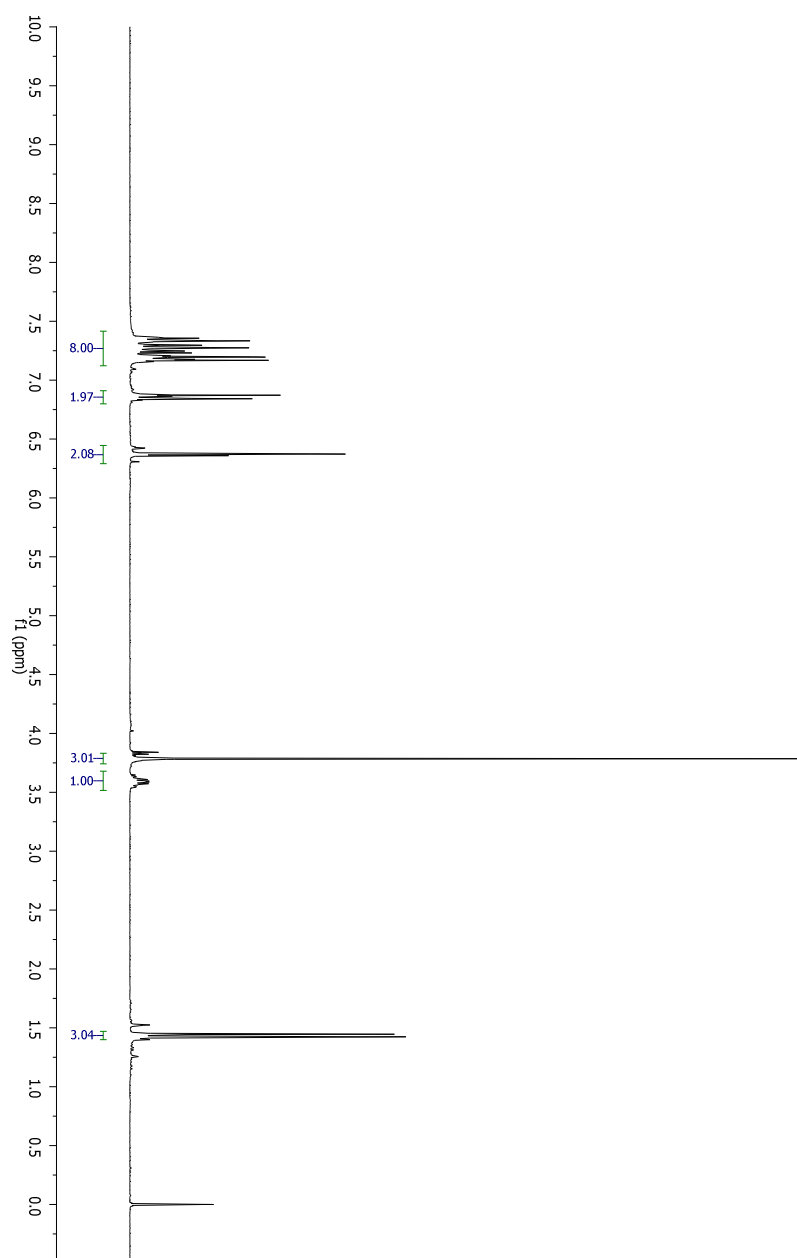

**3bl**  $^1\text{H}$  NMR

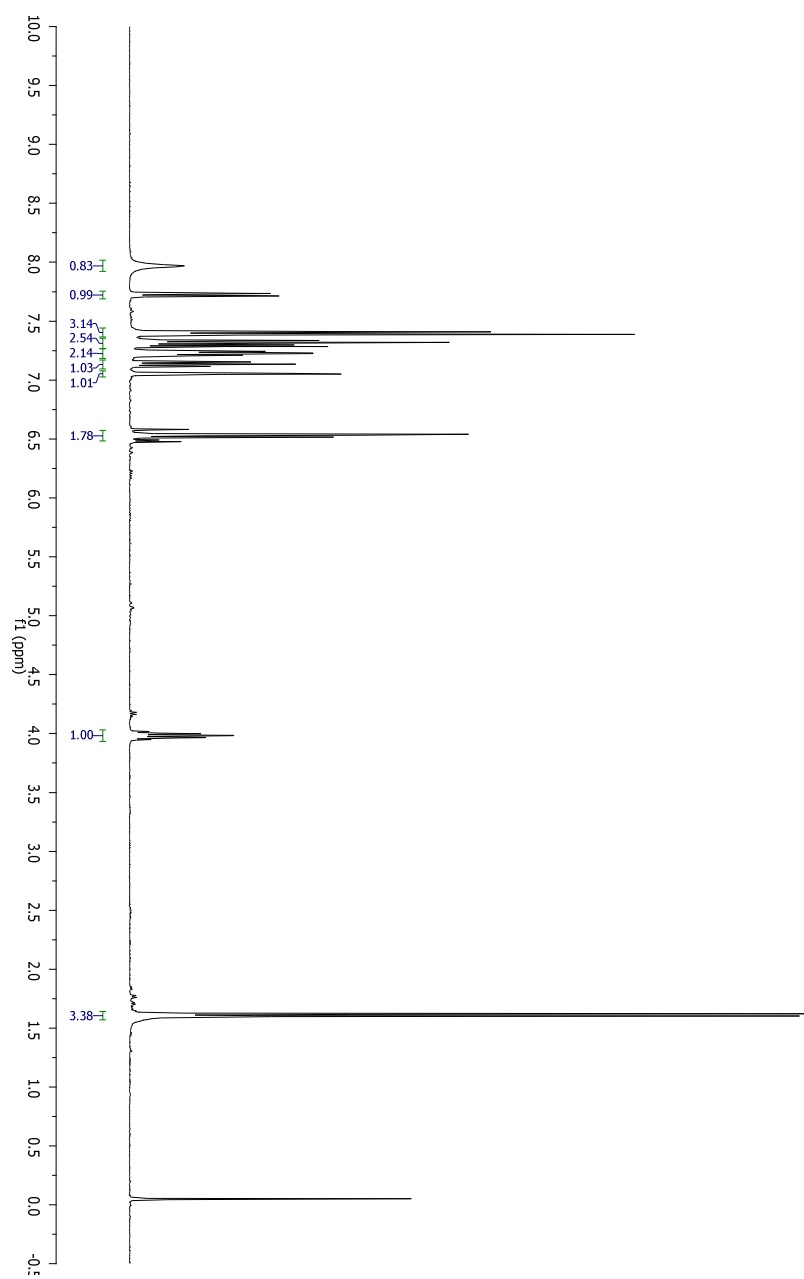

**3bl + 3bl'**  $^1\text{H}$  NMR

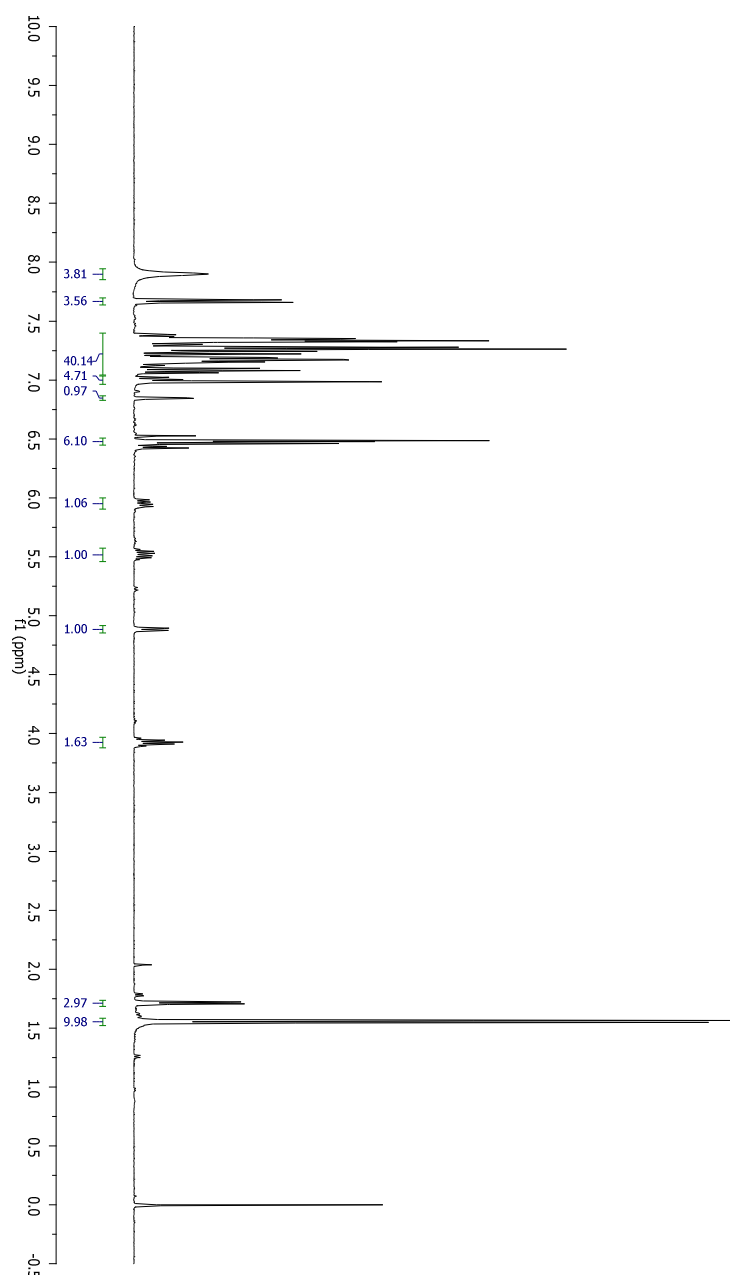

**3bo + 3bo'**  $^1\text{H}$  NMR

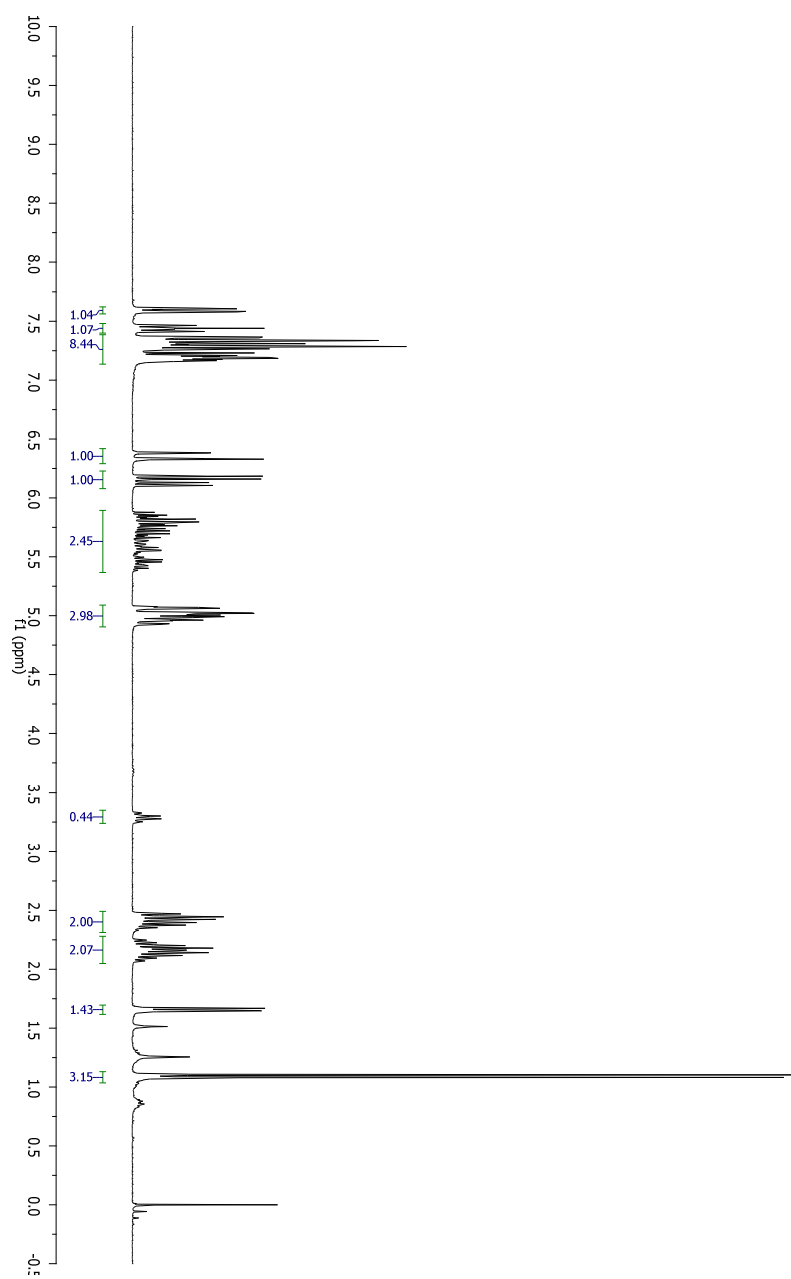

**3br + 3br'**  $^1\text{H}$  NMR

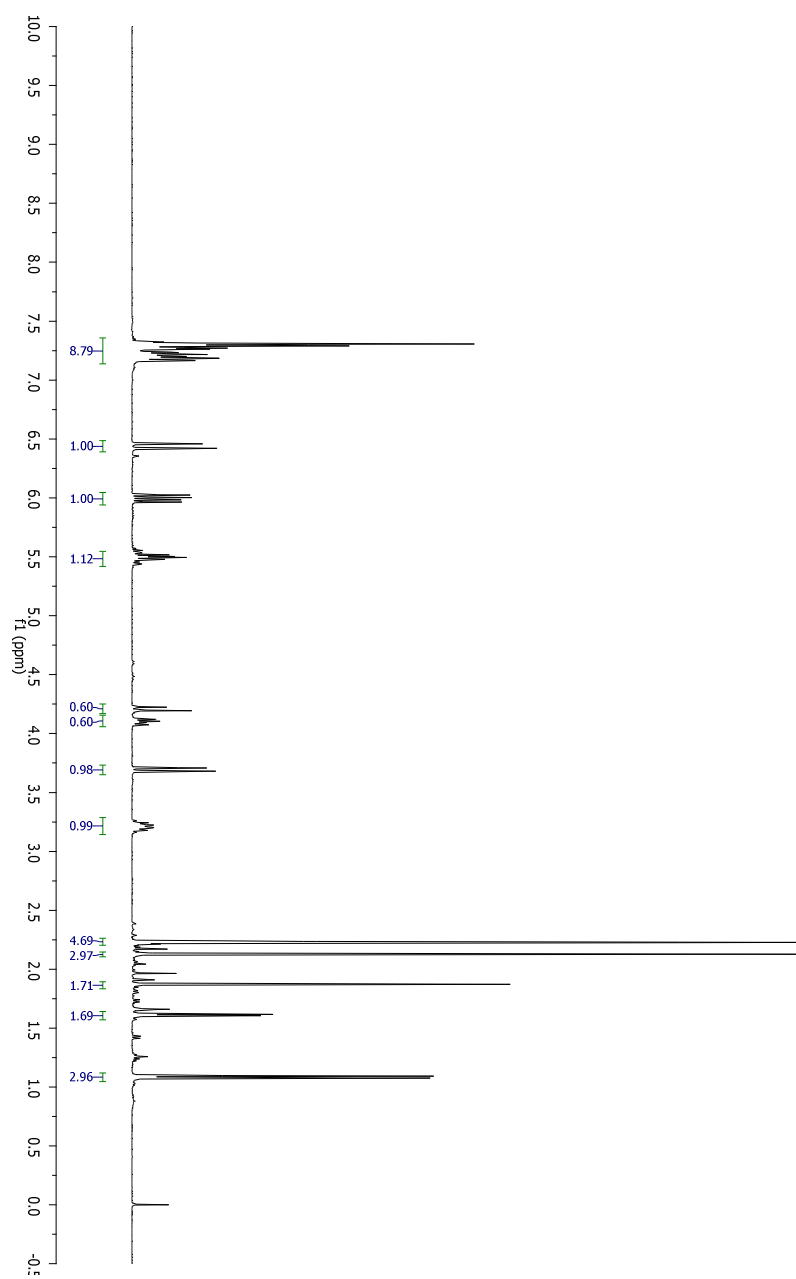

**3dj'**  $^1\text{H}$  NMR

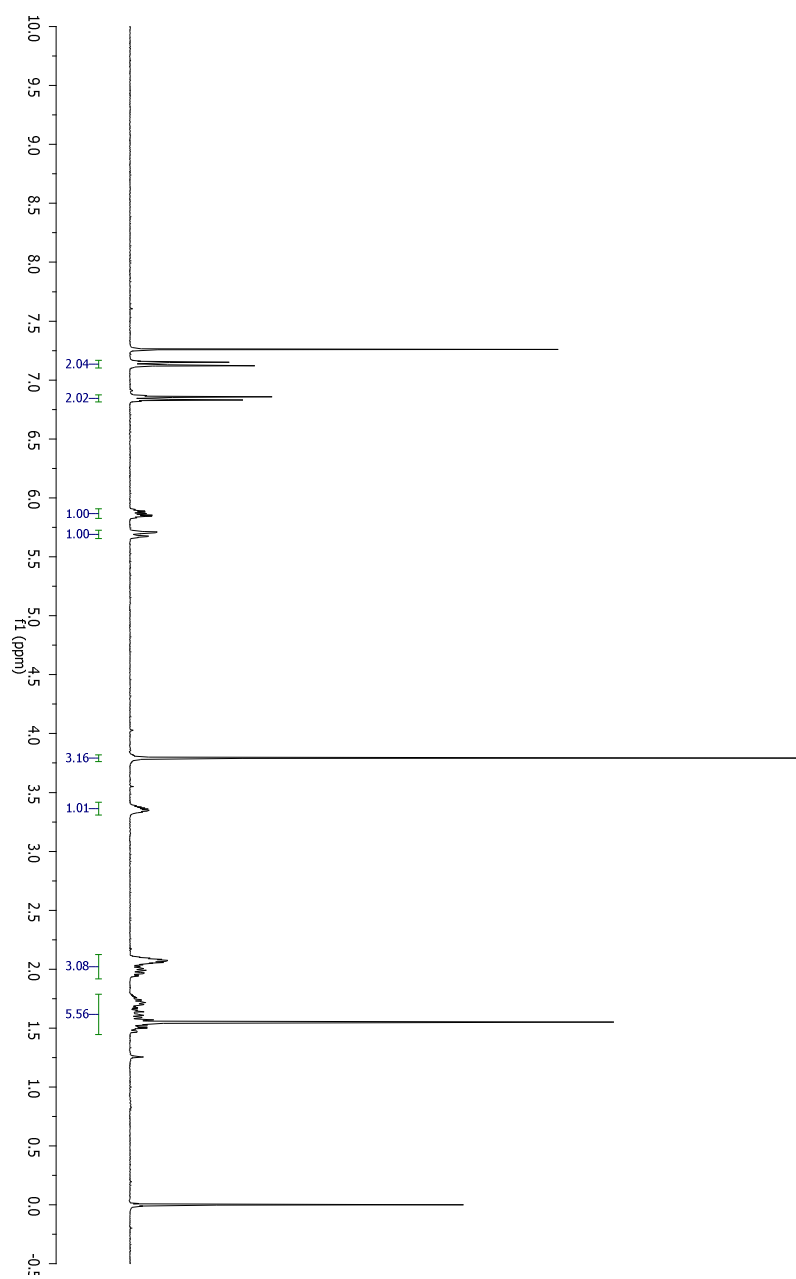

**3dj + 3dj''**  $^1\text{H}$  NMR

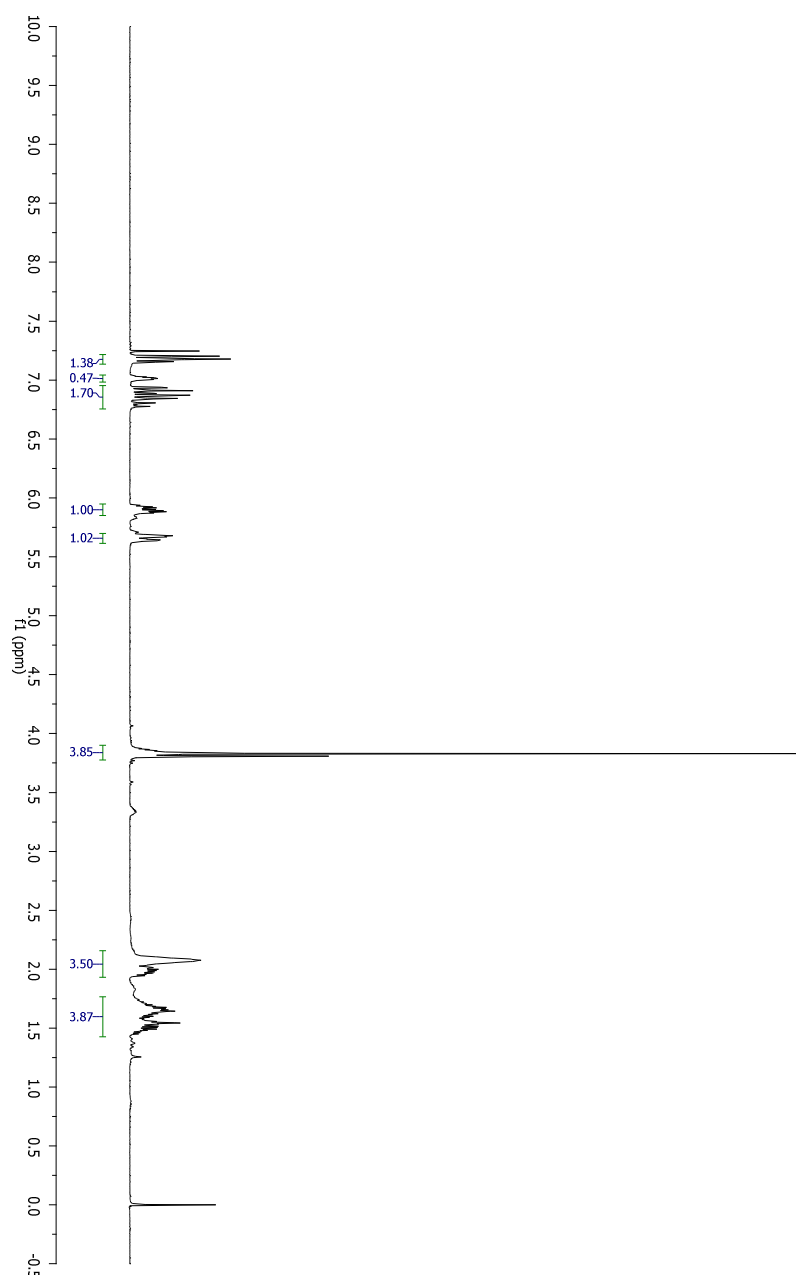



### 3do GC-MS

File : D:\MSDCHEM\1\DATA\2012-MARCH\PZ699.D  
Operator : pz  
Acquired : 2 Apr 2012 15:26 using AcqMethod BASICO  
Instrument : Instrumen  
Sample Name: pz699  
Misc Info :  
Vial Number: 1

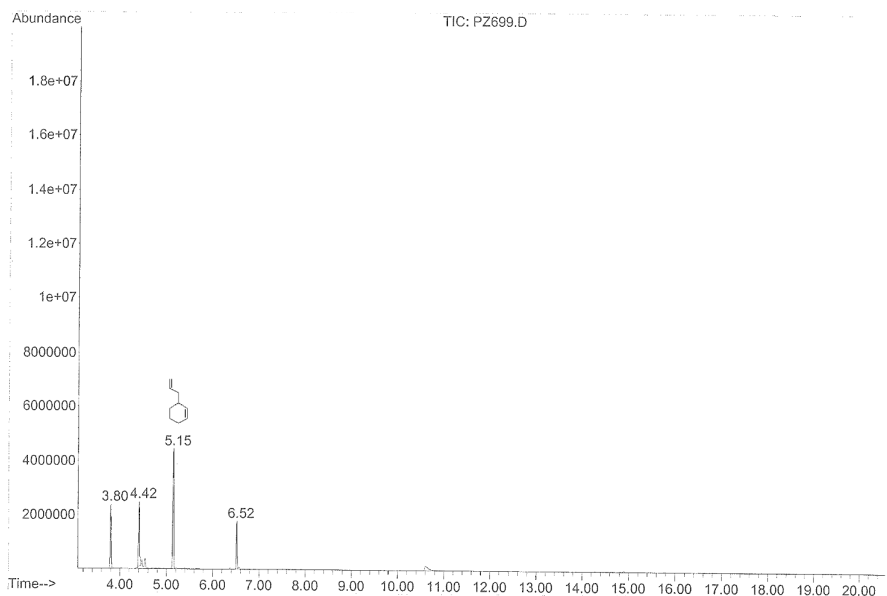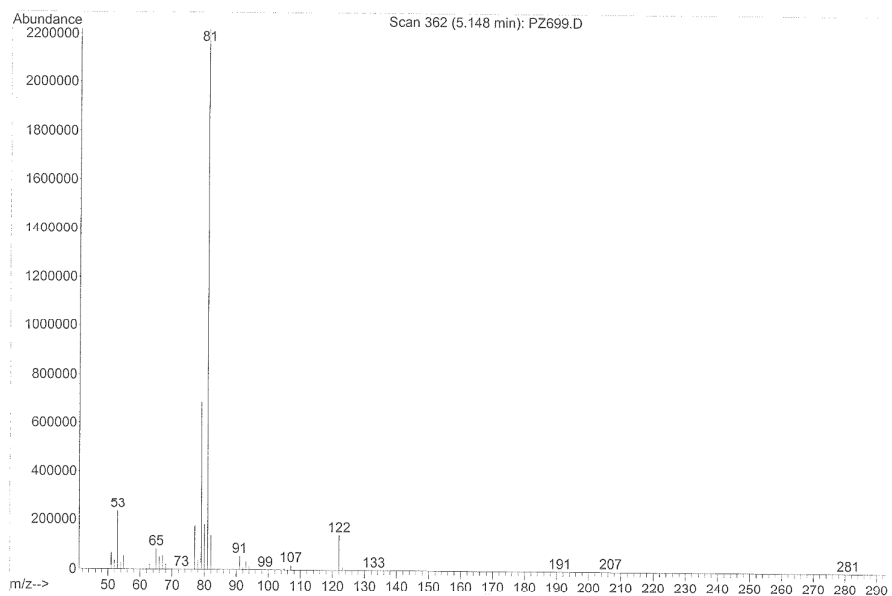

Supplement: Supplementary file 1 [file 4131940]
